# Supplementary material for: Real-world costs of autosomal dominant polycystic kidney disease in the Nordics
Source: Springer Nature journal article supplement (doi:10.1186/s12913-017-2513-8), 2017-08-15
Supplement: MOESM1 [file 14217852]

| Site ID |  |  |
|---------|--|--|
|         |  |  |

| Subject ID |  |  |
|------------|--|--|
|            |  |  |

## Case Report Form (CRF)

*Instructions and clarifications appear throughout this form in italic*

---

### Instructions

---

This CRF is used to collect data from medical charts of patients with autosomal dominant polycystic kidney disease (ADPKD). Subjects will be enrolled into the following mutually exclusive strata:

- Dialysis (initiated at least 6 months ago; with or without transplanted kidney)
- Transplant (working transplanted kidney since at least 6 months ago; not on dialysis)
- Chronic kidney disease (CKD) stage 4–5 (not currently on dialysis/no previous transplant)
- CKD stage 1–3 (not currently on dialysis/no previous transplant)

The following eligibility criteria will apply:

- 18 years of age or older
- Managed for ADPKD/CKD at your clinical site during the past 12 months
- Diagnosed with ADPKD and CKD at least 12 months ago
- Estimated Glomerular Filtration Rate (eGFR) laboratory result available in the past 12 months
  - Not applicable if subject is on dialysis
- Has NOT been involved in an investigational drug trial that resulted in a change in standard care received in the past 12 months
  - If there was no change in the care received, the patient is eligible
- If patients is on regular dialysis, date of dialysis initiation was at least 6 months ago
- If patient now has a working kidney transplant, date of transplant was at least 6 months ago
- Receipt of informed consent

Please first review the subject's medical records to complete the eligibility criteria on the following pages. Thereafter, continue filling out the rest of this CRF. The answers to questions 1–6 of the CRF are used to classify subjects into the 4 mutually exclusive strata.

Remember to document enrolled subjects on the *Subject Identification Code List* (assign each subject with a unique site/subject ID number, which is also recorded on each page of this CRF, and use this list to keep track of the number of subjects enrolled into each respective stratum).

| Site ID |  |  |
|---------|--|--|
|         |  |  |

| Subject ID |  |  |
|------------|--|--|
|            |  |  |

---

### Overview of CRF

---

Apart from *eligibility criteria* and *disease status* on the following pages and the *signature page* on the last page, this CRF can be divided into 3 major parts based on the type of data collected:

- I. Data on disease status and current resource use [Strata: *All subjects*]
  - Demographic Data and ADPKD Disease History
  - ADPKD-Related Medical Resource Use (Past 12 Months)
  - ADPKD-Related Medication Use (Past 12 Months)
  - Dialysis-Related Resource Use (Past 12 Months)
- II. Data from the period around initiation of dialysis [Strata: *Dialysis*]
  - Dialysis-Related Resource Use (Period around initiation of Dialysis)
- III. Data from the period around transplant operation [Strata: *Transplant*]
  - Kidney Transplant-Related Resource Use (Period around the Transplant)

In Part I, data are collected on *all subjects*. Part II only applies to subjects enrolled into the strata *Dialysis*, whereas Part III applies to the *Transplant* strata.

The following figure gives an overview of the data collected and the structure of this CRF.

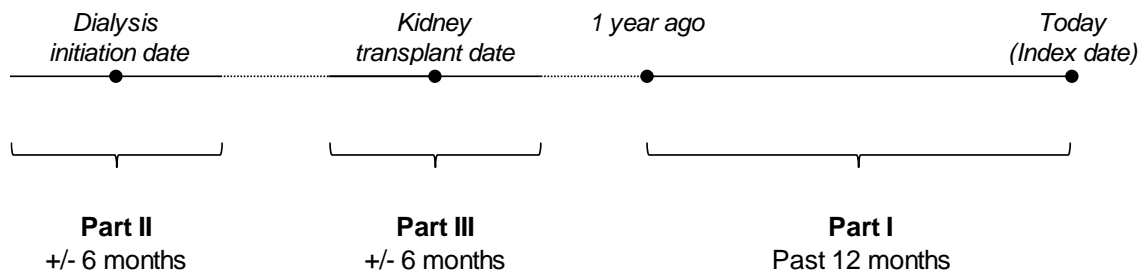

| Site ID |  |  |
|---------|--|--|
|         |  |  |

| Subject ID |  |  |
|------------|--|--|
|            |  |  |

---

### Eligibility Criteria

---

1. Please complete the following questions and confirm below that the subject meets all inclusion and exclusion criteria

a. Enrolment date (date of data abstraction for the subject)  
(End date)

|   |   |   |   |   |   |   |   |
|---|---|---|---|---|---|---|---|
|   |   | / |   |   | / |   |   |
| D | D |   | M | M |   | Y | Y |

b. Date one year prior (subtract 12 months from the date above)  
(Start date)

|   |   |   |   |   |   |   |   |
|---|---|---|---|---|---|---|---|
|   |   | / |   |   | / |   |   |
| D | D |   | M | M |   | Y | Y |

c. Please indicate subject's month and year of birth.

*If <18 years old, ineligible*

|   |   |   |   |   |   |   |  |
|---|---|---|---|---|---|---|--|
|   |   | / |   |   |   |   |  |
| M | M |   | Y | Y | Y | Y |  |

d. Has the subject been managed for autosomal dominant polycystic kidney disease (ADPKD)/chronic kidney disease (CKD) at your clinical site during the past 12 months?

- Yes  
 No (*Ineligible*)

e. Has the subject had ADPKD and CKD for at least 12 months?

- Yes  
 No (*Ineligible*)

f. Does the subject have an estimated GFR (eGFR) reported in the past 12 months?

- Yes  
 No (*Ineligible*)  
 Not applicable (subject is on dialysis)

g. Has the subject been involved in an investigational drug trial in the past 12 months

- Yes, that did result in a change in standard of care (*Ineligible*)  
 Yes, that did not result in a change in standard of care  
 No

h. If the subject is on regular dialysis, was the date of dialysis initiation at least 6 months ago?

- Yes  
 No (*Ineligible*)  
 Not applicable (subject is not on dialysis)

i. If the subject now has a working kidney transplant, was the date of transplant procedure at least 6 months ago?

- Yes  
 No (*Ineligible*)  
 Not applicable (subject does not have a working transplant)

j. Has informed consent been received from the subject?

- Yes  
 No (*Ineligible*)

Cost of ADPKD patients at different stages of disease  
in the Nordic countries

| Site ID |  |  |
|---------|--|--|
|         |  |  |

| Subject ID |  |  |
|------------|--|--|
|            |  |  |

2. Is the subject eligible for study participation based on the information provided above?

*Please make sure all questions above are answered before confirming eligibility.*

- Yes  
 No

If yes, please continue filling out the CRF for this subject. The pages that follow are only to be completed for patients that fulfil all eligibility criteria.

Cost of ADPKD patients at different stages of disease in the Nordic countries

**Site ID**

|  |  |  |
|--|--|--|
|  |  |  |
|--|--|--|

**Subject ID**

|  |  |  |
|--|--|--|
|  |  |  |
|--|--|--|

**ADPKD Disease Status (Classification of Subjects into Strata)**

*Information collected in this section is used to categorize patients (for enrolment of subjects into strata)*

3. Regular dialysis

*This refers to regular dialysis due to chronic kidney disease (i.e. not temporary dialysis)*

a. Is the subject currently receiving regular dialysis?

- Yes
- No
- Do not know

b. Has the subject previously been receiving regular dialysis?

- Yes
- No
- Do not know

c. If yes to either a) or b) above, please indicate the date(s) when the subject started/ended regular dialysis.

|                                                                                                                                                                                                                                                                                                                                                                                                                                                                                                                                                                                                                                                                                                                                                                                                                                                                                                                                                                                                                                                                                                                                                                                                                                                                                                                             |                                                                |   |   |   |   |   |   |   |   |   |   |   |   |   |   |   |   |   |   |   |   |   |   |   |   |   |   |   |   |                                                                                                                                                                                                                                                                                                                                                                                                                                                                                                                                                                                                                                                                                                                                                                                                                                                                                                                                                                                                                                                                                                                                                                                                                                                                                                                             |  |  |  |  |  |  |  |  |  |  |  |  |   |   |   |   |   |   |   |   |   |   |   |   |   |   |   |   |   |
|-----------------------------------------------------------------------------------------------------------------------------------------------------------------------------------------------------------------------------------------------------------------------------------------------------------------------------------------------------------------------------------------------------------------------------------------------------------------------------------------------------------------------------------------------------------------------------------------------------------------------------------------------------------------------------------------------------------------------------------------------------------------------------------------------------------------------------------------------------------------------------------------------------------------------------------------------------------------------------------------------------------------------------------------------------------------------------------------------------------------------------------------------------------------------------------------------------------------------------------------------------------------------------------------------------------------------------|----------------------------------------------------------------|---|---|---|---|---|---|---|---|---|---|---|---|---|---|---|---|---|---|---|---|---|---|---|---|---|---|---|---|-----------------------------------------------------------------------------------------------------------------------------------------------------------------------------------------------------------------------------------------------------------------------------------------------------------------------------------------------------------------------------------------------------------------------------------------------------------------------------------------------------------------------------------------------------------------------------------------------------------------------------------------------------------------------------------------------------------------------------------------------------------------------------------------------------------------------------------------------------------------------------------------------------------------------------------------------------------------------------------------------------------------------------------------------------------------------------------------------------------------------------------------------------------------------------------------------------------------------------------------------------------------------------------------------------------------------------|--|--|--|--|--|--|--|--|--|--|--|--|---|---|---|---|---|---|---|---|---|---|---|---|---|---|---|---|---|
| Dialysis start date                                                                                                                                                                                                                                                                                                                                                                                                                                                                                                                                                                                                                                                                                                                                                                                                                                                                                                                                                                                                                                                                                                                                                                                                                                                                                                         | End date (if applicable, leave empty if currently on dialysis) |   |   |   |   |   |   |   |   |   |   |   |   |   |   |   |   |   |   |   |   |   |   |   |   |   |   |   |   |                                                                                                                                                                                                                                                                                                                                                                                                                                                                                                                                                                                                                                                                                                                                                                                                                                                                                                                                                                                                                                                                                                                                                                                                                                                                                                                             |  |  |  |  |  |  |  |  |  |  |  |  |   |   |   |   |   |   |   |   |   |   |   |   |   |   |   |   |   |
| <table border="1" style="width: 100%; border-collapse: collapse;"> <tr> <td style="width: 20px; height: 20px;"></td><td style="width: 20px; height: 20px;"></td><td style="width: 20px; height: 20px;"></td><td style="width: 20px; height: 20px;"></td> <td style="width: 20px; height: 20px;"></td><td style="width: 20px; height: 20px;"></td><td style="width: 20px; height: 20px;"></td><td style="width: 20px; height: 20px;"></td> <td style="width: 20px; height: 20px;"></td><td style="width: 20px; height: 20px;"></td><td style="width: 20px; height: 20px;"></td><td style="width: 20px; height: 20px;"></td> </tr> <tr> <td style="text-align: center;">D</td><td style="text-align: center;">D</td><td style="text-align: center;">M</td><td style="text-align: center;">M</td><td style="text-align: center;">Y</td><td style="text-align: center;">Y</td><td style="text-align: center;">Y</td><td style="text-align: center;">Y</td><td style="text-align: center;">/</td><td style="text-align: center;">D</td><td style="text-align: center;">D</td><td style="text-align: center;">M</td><td style="text-align: center;">M</td><td style="text-align: center;">Y</td><td style="text-align: center;">Y</td><td style="text-align: center;">Y</td><td style="text-align: center;">Y</td> </tr> </table> |                                                                |   |   |   |   |   |   |   |   |   |   |   | D | D | M | M | Y | Y | Y | Y | / | D | D | M | M | Y | Y | Y | Y | <table border="1" style="width: 100%; border-collapse: collapse;"> <tr> <td style="width: 20px; height: 20px;"></td><td style="width: 20px; height: 20px;"></td><td style="width: 20px; height: 20px;"></td><td style="width: 20px; height: 20px;"></td> <td style="width: 20px; height: 20px;"></td><td style="width: 20px; height: 20px;"></td><td style="width: 20px; height: 20px;"></td><td style="width: 20px; height: 20px;"></td> <td style="width: 20px; height: 20px;"></td><td style="width: 20px; height: 20px;"></td><td style="width: 20px; height: 20px;"></td><td style="width: 20px; height: 20px;"></td> </tr> <tr> <td style="text-align: center;">D</td><td style="text-align: center;">D</td><td style="text-align: center;">M</td><td style="text-align: center;">M</td><td style="text-align: center;">Y</td><td style="text-align: center;">Y</td><td style="text-align: center;">Y</td><td style="text-align: center;">Y</td><td style="text-align: center;">/</td><td style="text-align: center;">D</td><td style="text-align: center;">D</td><td style="text-align: center;">M</td><td style="text-align: center;">M</td><td style="text-align: center;">Y</td><td style="text-align: center;">Y</td><td style="text-align: center;">Y</td><td style="text-align: center;">Y</td> </tr> </table> |  |  |  |  |  |  |  |  |  |  |  |  | D | D | M | M | Y | Y | Y | Y | / | D | D | M | M | Y | Y | Y | Y |
|                                                                                                                                                                                                                                                                                                                                                                                                                                                                                                                                                                                                                                                                                                                                                                                                                                                                                                                                                                                                                                                                                                                                                                                                                                                                                                                             |                                                                |   |   |   |   |   |   |   |   |   |   |   |   |   |   |   |   |   |   |   |   |   |   |   |   |   |   |   |   |                                                                                                                                                                                                                                                                                                                                                                                                                                                                                                                                                                                                                                                                                                                                                                                                                                                                                                                                                                                                                                                                                                                                                                                                                                                                                                                             |  |  |  |  |  |  |  |  |  |  |  |  |   |   |   |   |   |   |   |   |   |   |   |   |   |   |   |   |   |
| D                                                                                                                                                                                                                                                                                                                                                                                                                                                                                                                                                                                                                                                                                                                                                                                                                                                                                                                                                                                                                                                                                                                                                                                                                                                                                                                           | D                                                              | M | M | Y | Y | Y | Y | / | D | D | M | M | Y | Y | Y | Y |   |   |   |   |   |   |   |   |   |   |   |   |   |                                                                                                                                                                                                                                                                                                                                                                                                                                                                                                                                                                                                                                                                                                                                                                                                                                                                                                                                                                                                                                                                                                                                                                                                                                                                                                                             |  |  |  |  |  |  |  |  |  |  |  |  |   |   |   |   |   |   |   |   |   |   |   |   |   |   |   |   |   |
|                                                                                                                                                                                                                                                                                                                                                                                                                                                                                                                                                                                                                                                                                                                                                                                                                                                                                                                                                                                                                                                                                                                                                                                                                                                                                                                             |                                                                |   |   |   |   |   |   |   |   |   |   |   |   |   |   |   |   |   |   |   |   |   |   |   |   |   |   |   |   |                                                                                                                                                                                                                                                                                                                                                                                                                                                                                                                                                                                                                                                                                                                                                                                                                                                                                                                                                                                                                                                                                                                                                                                                                                                                                                                             |  |  |  |  |  |  |  |  |  |  |  |  |   |   |   |   |   |   |   |   |   |   |   |   |   |   |   |   |   |
| D                                                                                                                                                                                                                                                                                                                                                                                                                                                                                                                                                                                                                                                                                                                                                                                                                                                                                                                                                                                                                                                                                                                                                                                                                                                                                                                           | D                                                              | M | M | Y | Y | Y | Y | / | D | D | M | M | Y | Y | Y | Y |   |   |   |   |   |   |   |   |   |   |   |   |   |                                                                                                                                                                                                                                                                                                                                                                                                                                                                                                                                                                                                                                                                                                                                                                                                                                                                                                                                                                                                                                                                                                                                                                                                                                                                                                                             |  |  |  |  |  |  |  |  |  |  |  |  |   |   |   |   |   |   |   |   |   |   |   |   |   |   |   |   |   |
| <u>If</u> subject has previously been on dialysis, please provide dates below                                                                                                                                                                                                                                                                                                                                                                                                                                                                                                                                                                                                                                                                                                                                                                                                                                                                                                                                                                                                                                                                                                                                                                                                                                               |                                                                |   |   |   |   |   |   |   |   |   |   |   |   |   |   |   |   |   |   |   |   |   |   |   |   |   |   |   |   |                                                                                                                                                                                                                                                                                                                                                                                                                                                                                                                                                                                                                                                                                                                                                                                                                                                                                                                                                                                                                                                                                                                                                                                                                                                                                                                             |  |  |  |  |  |  |  |  |  |  |  |  |   |   |   |   |   |   |   |   |   |   |   |   |   |   |   |   |   |
| Dialysis start date                                                                                                                                                                                                                                                                                                                                                                                                                                                                                                                                                                                                                                                                                                                                                                                                                                                                                                                                                                                                                                                                                                                                                                                                                                                                                                         | End date                                                       |   |   |   |   |   |   |   |   |   |   |   |   |   |   |   |   |   |   |   |   |   |   |   |   |   |   |   |   |                                                                                                                                                                                                                                                                                                                                                                                                                                                                                                                                                                                                                                                                                                                                                                                                                                                                                                                                                                                                                                                                                                                                                                                                                                                                                                                             |  |  |  |  |  |  |  |  |  |  |  |  |   |   |   |   |   |   |   |   |   |   |   |   |   |   |   |   |   |
| <table border="1" style="width: 100%; border-collapse: collapse;"> <tr> <td style="width: 20px; height: 20px;"></td><td style="width: 20px; height: 20px;"></td><td style="width: 20px; height: 20px;"></td><td style="width: 20px; height: 20px;"></td> <td style="width: 20px; height: 20px;"></td><td style="width: 20px; height: 20px;"></td><td style="width: 20px; height: 20px;"></td><td style="width: 20px; height: 20px;"></td> <td style="width: 20px; height: 20px;"></td><td style="width: 20px; height: 20px;"></td><td style="width: 20px; height: 20px;"></td><td style="width: 20px; height: 20px;"></td> </tr> <tr> <td style="text-align: center;">D</td><td style="text-align: center;">D</td><td style="text-align: center;">M</td><td style="text-align: center;">M</td><td style="text-align: center;">Y</td><td style="text-align: center;">Y</td><td style="text-align: center;">Y</td><td style="text-align: center;">Y</td><td style="text-align: center;">/</td><td style="text-align: center;">D</td><td style="text-align: center;">D</td><td style="text-align: center;">M</td><td style="text-align: center;">M</td><td style="text-align: center;">Y</td><td style="text-align: center;">Y</td><td style="text-align: center;">Y</td><td style="text-align: center;">Y</td> </tr> </table> |                                                                |   |   |   |   |   |   |   |   |   |   |   | D | D | M | M | Y | Y | Y | Y | / | D | D | M | M | Y | Y | Y | Y | <table border="1" style="width: 100%; border-collapse: collapse;"> <tr> <td style="width: 20px; height: 20px;"></td><td style="width: 20px; height: 20px;"></td><td style="width: 20px; height: 20px;"></td><td style="width: 20px; height: 20px;"></td> <td style="width: 20px; height: 20px;"></td><td style="width: 20px; height: 20px;"></td><td style="width: 20px; height: 20px;"></td><td style="width: 20px; height: 20px;"></td> <td style="width: 20px; height: 20px;"></td><td style="width: 20px; height: 20px;"></td><td style="width: 20px; height: 20px;"></td><td style="width: 20px; height: 20px;"></td> </tr> <tr> <td style="text-align: center;">D</td><td style="text-align: center;">D</td><td style="text-align: center;">M</td><td style="text-align: center;">M</td><td style="text-align: center;">Y</td><td style="text-align: center;">Y</td><td style="text-align: center;">Y</td><td style="text-align: center;">Y</td><td style="text-align: center;">/</td><td style="text-align: center;">D</td><td style="text-align: center;">D</td><td style="text-align: center;">M</td><td style="text-align: center;">M</td><td style="text-align: center;">Y</td><td style="text-align: center;">Y</td><td style="text-align: center;">Y</td><td style="text-align: center;">Y</td> </tr> </table> |  |  |  |  |  |  |  |  |  |  |  |  | D | D | M | M | Y | Y | Y | Y | / | D | D | M | M | Y | Y | Y | Y |
|                                                                                                                                                                                                                                                                                                                                                                                                                                                                                                                                                                                                                                                                                                                                                                                                                                                                                                                                                                                                                                                                                                                                                                                                                                                                                                                             |                                                                |   |   |   |   |   |   |   |   |   |   |   |   |   |   |   |   |   |   |   |   |   |   |   |   |   |   |   |   |                                                                                                                                                                                                                                                                                                                                                                                                                                                                                                                                                                                                                                                                                                                                                                                                                                                                                                                                                                                                                                                                                                                                                                                                                                                                                                                             |  |  |  |  |  |  |  |  |  |  |  |  |   |   |   |   |   |   |   |   |   |   |   |   |   |   |   |   |   |
| D                                                                                                                                                                                                                                                                                                                                                                                                                                                                                                                                                                                                                                                                                                                                                                                                                                                                                                                                                                                                                                                                                                                                                                                                                                                                                                                           | D                                                              | M | M | Y | Y | Y | Y | / | D | D | M | M | Y | Y | Y | Y |   |   |   |   |   |   |   |   |   |   |   |   |   |                                                                                                                                                                                                                                                                                                                                                                                                                                                                                                                                                                                                                                                                                                                                                                                                                                                                                                                                                                                                                                                                                                                                                                                                                                                                                                                             |  |  |  |  |  |  |  |  |  |  |  |  |   |   |   |   |   |   |   |   |   |   |   |   |   |   |   |   |   |
|                                                                                                                                                                                                                                                                                                                                                                                                                                                                                                                                                                                                                                                                                                                                                                                                                                                                                                                                                                                                                                                                                                                                                                                                                                                                                                                             |                                                                |   |   |   |   |   |   |   |   |   |   |   |   |   |   |   |   |   |   |   |   |   |   |   |   |   |   |   |   |                                                                                                                                                                                                                                                                                                                                                                                                                                                                                                                                                                                                                                                                                                                                                                                                                                                                                                                                                                                                                                                                                                                                                                                                                                                                                                                             |  |  |  |  |  |  |  |  |  |  |  |  |   |   |   |   |   |   |   |   |   |   |   |   |   |   |   |   |   |
| D                                                                                                                                                                                                                                                                                                                                                                                                                                                                                                                                                                                                                                                                                                                                                                                                                                                                                                                                                                                                                                                                                                                                                                                                                                                                                                                           | D                                                              | M | M | Y | Y | Y | Y | / | D | D | M | M | Y | Y | Y | Y |   |   |   |   |   |   |   |   |   |   |   |   |   |                                                                                                                                                                                                                                                                                                                                                                                                                                                                                                                                                                                                                                                                                                                                                                                                                                                                                                                                                                                                                                                                                                                                                                                                                                                                                                                             |  |  |  |  |  |  |  |  |  |  |  |  |   |   |   |   |   |   |   |   |   |   |   |   |   |   |   |   |   |
| <table border="1" style="width: 100%; border-collapse: collapse;"> <tr> <td style="width: 20px; height: 20px;"></td><td style="width: 20px; height: 20px;"></td><td style="width: 20px; height: 20px;"></td><td style="width: 20px; height: 20px;"></td> <td style="width: 20px; height: 20px;"></td><td style="width: 20px; height: 20px;"></td><td style="width: 20px; height: 20px;"></td><td style="width: 20px; height: 20px;"></td> <td style="width: 20px; height: 20px;"></td><td style="width: 20px; height: 20px;"></td><td style="width: 20px; height: 20px;"></td><td style="width: 20px; height: 20px;"></td> </tr> <tr> <td style="text-align: center;">D</td><td style="text-align: center;">D</td><td style="text-align: center;">M</td><td style="text-align: center;">M</td><td style="text-align: center;">Y</td><td style="text-align: center;">Y</td><td style="text-align: center;">Y</td><td style="text-align: center;">Y</td><td style="text-align: center;">/</td><td style="text-align: center;">D</td><td style="text-align: center;">D</td><td style="text-align: center;">M</td><td style="text-align: center;">M</td><td style="text-align: center;">Y</td><td style="text-align: center;">Y</td><td style="text-align: center;">Y</td><td style="text-align: center;">Y</td> </tr> </table> |                                                                |   |   |   |   |   |   |   |   |   |   |   | D | D | M | M | Y | Y | Y | Y | / | D | D | M | M | Y | Y | Y | Y | <table border="1" style="width: 100%; border-collapse: collapse;"> <tr> <td style="width: 20px; height: 20px;"></td><td style="width: 20px; height: 20px;"></td><td style="width: 20px; height: 20px;"></td><td style="width: 20px; height: 20px;"></td> <td style="width: 20px; height: 20px;"></td><td style="width: 20px; height: 20px;"></td><td style="width: 20px; height: 20px;"></td><td style="width: 20px; height: 20px;"></td> <td style="width: 20px; height: 20px;"></td><td style="width: 20px; height: 20px;"></td><td style="width: 20px; height: 20px;"></td><td style="width: 20px; height: 20px;"></td> </tr> <tr> <td style="text-align: center;">D</td><td style="text-align: center;">D</td><td style="text-align: center;">M</td><td style="text-align: center;">M</td><td style="text-align: center;">Y</td><td style="text-align: center;">Y</td><td style="text-align: center;">Y</td><td style="text-align: center;">Y</td><td style="text-align: center;">/</td><td style="text-align: center;">D</td><td style="text-align: center;">D</td><td style="text-align: center;">M</td><td style="text-align: center;">M</td><td style="text-align: center;">Y</td><td style="text-align: center;">Y</td><td style="text-align: center;">Y</td><td style="text-align: center;">Y</td> </tr> </table> |  |  |  |  |  |  |  |  |  |  |  |  | D | D | M | M | Y | Y | Y | Y | / | D | D | M | M | Y | Y | Y | Y |
|                                                                                                                                                                                                                                                                                                                                                                                                                                                                                                                                                                                                                                                                                                                                                                                                                                                                                                                                                                                                                                                                                                                                                                                                                                                                                                                             |                                                                |   |   |   |   |   |   |   |   |   |   |   |   |   |   |   |   |   |   |   |   |   |   |   |   |   |   |   |   |                                                                                                                                                                                                                                                                                                                                                                                                                                                                                                                                                                                                                                                                                                                                                                                                                                                                                                                                                                                                                                                                                                                                                                                                                                                                                                                             |  |  |  |  |  |  |  |  |  |  |  |  |   |   |   |   |   |   |   |   |   |   |   |   |   |   |   |   |   |
| D                                                                                                                                                                                                                                                                                                                                                                                                                                                                                                                                                                                                                                                                                                                                                                                                                                                                                                                                                                                                                                                                                                                                                                                                                                                                                                                           | D                                                              | M | M | Y | Y | Y | Y | / | D | D | M | M | Y | Y | Y | Y |   |   |   |   |   |   |   |   |   |   |   |   |   |                                                                                                                                                                                                                                                                                                                                                                                                                                                                                                                                                                                                                                                                                                                                                                                                                                                                                                                                                                                                                                                                                                                                                                                                                                                                                                                             |  |  |  |  |  |  |  |  |  |  |  |  |   |   |   |   |   |   |   |   |   |   |   |   |   |   |   |   |   |
|                                                                                                                                                                                                                                                                                                                                                                                                                                                                                                                                                                                                                                                                                                                                                                                                                                                                                                                                                                                                                                                                                                                                                                                                                                                                                                                             |                                                                |   |   |   |   |   |   |   |   |   |   |   |   |   |   |   |   |   |   |   |   |   |   |   |   |   |   |   |   |                                                                                                                                                                                                                                                                                                                                                                                                                                                                                                                                                                                                                                                                                                                                                                                                                                                                                                                                                                                                                                                                                                                                                                                                                                                                                                                             |  |  |  |  |  |  |  |  |  |  |  |  |   |   |   |   |   |   |   |   |   |   |   |   |   |   |   |   |   |
| D                                                                                                                                                                                                                                                                                                                                                                                                                                                                                                                                                                                                                                                                                                                                                                                                                                                                                                                                                                                                                                                                                                                                                                                                                                                                                                                           | D                                                              | M | M | Y | Y | Y | Y | / | D | D | M | M | Y | Y | Y | Y |   |   |   |   |   |   |   |   |   |   |   |   |   |                                                                                                                                                                                                                                                                                                                                                                                                                                                                                                                                                                                                                                                                                                                                                                                                                                                                                                                                                                                                                                                                                                                                                                                                                                                                                                                             |  |  |  |  |  |  |  |  |  |  |  |  |   |   |   |   |   |   |   |   |   |   |   |   |   |   |   |   |   |

*If more room is required than the space provided, please use a separate piece of paper.*

4. Kidney transplant

a. Has the subject had a kidney transplant?

- Yes
- No
- Do not know

b. If yes, how many kidney transplants have the subject had?

|  |  |               |
|--|--|---------------|
|  |  | transplant(s) |
|--|--|---------------|

Cost of ADPKD patients at different stages of disease in the Nordic countries

| Site ID |  |  |
|---------|--|--|
|         |  |  |

| Subject ID |  |  |
|------------|--|--|
|            |  |  |

c. If yes, please indicate the date(s) of kidney transplant.

| Kidney transplant date                                                         |   |   |   |   |   |   |   |   |   |  |
|--------------------------------------------------------------------------------|---|---|---|---|---|---|---|---|---|--|
|                                                                                |   |   |   |   |   |   |   |   |   |  |
| D                                                                              | D | / | M | M | / | Y | Y | Y | Y |  |
| If subject has had more than one kidney transplant, please provide dates below |   |   |   |   |   |   |   |   |   |  |
|                                                                                |   |   |   |   |   |   |   |   |   |  |
| D                                                                              | D | / | M | M | / | Y | Y | Y | Y |  |
|                                                                                |   |   |   |   |   |   |   |   |   |  |
| D                                                                              | D | / | M | M | / | Y | Y | Y | Y |  |

If more room is required than the space provided, please use a separate piece of paper.

5. Renal function assessment (eGFR)

a. Please provide the subject's most recent estimated GFR.

|  |  |  |  |  |  |  |  |  |  |  |
|--|--|--|--|--|--|--|--|--|--|--|
|  |  |  |  |  |  |  |  |  |  |  |
|--|--|--|--|--|--|--|--|--|--|--|

 ml/min/1.73 m<sup>2</sup>

b. Please indicate the date assessed.

|   |   |   |   |   |   |   |   |   |   |  |
|---|---|---|---|---|---|---|---|---|---|--|
|   |   |   |   |   |   |   |   |   |   |  |
| D | D | / | M | M | / | Y | Y | Y | Y |  |

c. Please indicate the equation/formula used.

- MDRD (Modification of Diet in Renal Disease)
- CKD-EPI (Chronic Kidney Disease Epidemiology Collaboration)
- Cockcroft-Gault
- Lund-Malmö
- Other, specify:  
\_\_\_\_\_

6. Based on the information collected above, to which stratum is the subject enrolled?

Each subject is enrolled into one of the four strata in a hierarchical fashion according to the order listed below. Please note that the strata are mutually exclusive.

For example, if a subject is currently on dialysis and also has had a kidney transplant, the subject is enrolled to the stratum "Dialysis" (not to "Transplant").

- Dialysis (initiated at least 6 months ago; with or without transplanted kidney)
- Transplant (working transplanted kidney since at least 6 months ago; not on dialysis)
- CDK stage 4–5 (<30 ml/min/1.73 m<sup>2</sup>; not currently on dialysis/no previous transplant)
- CKD stage 1–3 (≥30 ml/min/1.73 m<sup>2</sup>; not currently on dialysis/no previous transplant)

Cost of ADPKD patients at different stages of disease  
in the Nordic countries

| Site ID |  |  |
|---------|--|--|
|         |  |  |

| Subject ID |  |  |
|------------|--|--|
|            |  |  |

# Part I: Current Resource Use

Strata: *All subjects*

|  |  |  |
|--|--|--|
|  |  |  |
|--|--|--|

|  |  |  |
|--|--|--|
|  |  |  |
|--|--|--|

**Demographic Data and ADPKD Disease History**

7. Please indicate subject's gender

- Male
- Female

8. Please indicate subject's height

|  |  |  |  |  |
|--|--|--|--|--|
|  |  |  |  |  |
|--|--|--|--|--|

 cm

9. Please indicate subject's weight

*If the patient is on dialysis, please provide the subjects dry weight (the amount of body mass without extra fluid).*

|  |  |  |  |  |
|--|--|--|--|--|
|  |  |  |  |  |
|--|--|--|--|--|

 kg

10. Please indicate the subject's most recent blood pressure measurement.

*If the patient is on dialysis, please provide blood pressure reading taken after the dialysis session.*

| Blood pressure (systolic/diastolic)                                                                                                                                       | Date assessed |  |  |  |  |  |  |  |  |  |                                                                                                                                |  |  |  |  |  |  |  |  |
|---------------------------------------------------------------------------------------------------------------------------------------------------------------------------|---------------|--|--|--|--|--|--|--|--|--|--------------------------------------------------------------------------------------------------------------------------------|--|--|--|--|--|--|--|--|
| <table border="1"><tr><td></td><td></td><td></td><td></td><td></td></tr></table> / <table border="1"><tr><td></td><td></td><td></td><td></td><td></td></tr></table> mm Hg |               |  |  |  |  |  |  |  |  |  | <table border="1"><tr><td></td><td></td><td></td><td></td><td></td><td></td><td></td><td></td></tr></table><br>D D M M Y Y Y Y |  |  |  |  |  |  |  |  |
|                                                                                                                                                                           |               |  |  |  |  |  |  |  |  |  |                                                                                                                                |  |  |  |  |  |  |  |  |
|                                                                                                                                                                           |               |  |  |  |  |  |  |  |  |  |                                                                                                                                |  |  |  |  |  |  |  |  |
|                                                                                                                                                                           |               |  |  |  |  |  |  |  |  |  |                                                                                                                                |  |  |  |  |  |  |  |  |

11. Kidney volume/length

a. Has the subject had total kidney volume (TKV) and/or kidney length estimated?

- Yes
- No
- Do not know

b. If yes, please indicate the most recent total kidney volume (TKV) and/or kidney length measurement [provide the largest value(s) if the kidneys differ in TKV and/or length].

| Total kidney volume                                                                                                                                                    | Date assessed |  |  |  |  |                                                                                                                                |  |  |  |  |                                                                                                                                |  |  |  |  |  |  |  |  |
|------------------------------------------------------------------------------------------------------------------------------------------------------------------------|---------------|--|--|--|--|--------------------------------------------------------------------------------------------------------------------------------|--|--|--|--|--------------------------------------------------------------------------------------------------------------------------------|--|--|--|--|--|--|--|--|
| <table border="1"><tr><td></td><td></td><td></td><td></td><td></td></tr></table> cm <sup>3</sup> or ml                                                                 |               |  |  |  |  | <table border="1"><tr><td></td><td></td><td></td><td></td><td></td><td></td><td></td><td></td></tr></table><br>D D M M Y Y Y Y |  |  |  |  |                                                                                                                                |  |  |  |  |  |  |  |  |
|                                                                                                                                                                        |               |  |  |  |  |                                                                                                                                |  |  |  |  |                                                                                                                                |  |  |  |  |  |  |  |  |
|                                                                                                                                                                        |               |  |  |  |  |                                                                                                                                |  |  |  |  |                                                                                                                                |  |  |  |  |  |  |  |  |
| Kidney length                                                                                                                                                          | Date assessed |  |  |  |  |                                                                                                                                |  |  |  |  |                                                                                                                                |  |  |  |  |  |  |  |  |
| <table border="1"><tr><td></td><td></td><td></td><td></td><td></td></tr></table> · <table border="1"><tr><td></td><td></td><td></td><td></td><td></td></tr></table> cm |               |  |  |  |  |                                                                                                                                |  |  |  |  | <table border="1"><tr><td></td><td></td><td></td><td></td><td></td><td></td><td></td><td></td></tr></table><br>D D M M Y Y Y Y |  |  |  |  |  |  |  |  |
|                                                                                                                                                                        |               |  |  |  |  |                                                                                                                                |  |  |  |  |                                                                                                                                |  |  |  |  |  |  |  |  |
|                                                                                                                                                                        |               |  |  |  |  |                                                                                                                                |  |  |  |  |                                                                                                                                |  |  |  |  |  |  |  |  |
|                                                                                                                                                                        |               |  |  |  |  |                                                                                                                                |  |  |  |  |                                                                                                                                |  |  |  |  |  |  |  |  |

12. Dialysis/transplantation information

*This refers to the patient receiving information about different ways to treat end stage renal disease (ESRD). Please answer this question regardless of whether the subject already is on dialysis/has had a transplant, or not.*



Cost of ADPKD patients at different stages of disease in the Nordic countries

| Site ID |  |  |
|---------|--|--|
|         |  |  |

| Subject ID |  |  |
|------------|--|--|
|            |  |  |

a. Has the subject received information about dialysis and transplantation?

- Yes
- No
- Do not know

b. If yes, please indicate the month and year of first receiving information.

|   |   |   |   |   |   |   |  |
|---|---|---|---|---|---|---|--|
|   |   | / |   |   |   |   |  |
| M | M |   | Y | Y | Y | Y |  |

13. Decision about treatment modality

*After the information about treatment options are given, typically a decision is made regarding the modality of treatment. If several decisions have been conducted, please provide information on the most recent decision.*

a. Has a decision (e.g. dialysis, transplant, conservative treatment) about how to treat ESRD been made?

- Yes
- No
- Do not know

b. If yes, please indicate the month and year of the decision.

|   |   |   |   |   |   |   |  |
|---|---|---|---|---|---|---|--|
|   |   | / |   |   |   |   |  |
| M | M |   | Y | Y | Y | Y |  |

c. Has a living kidney donor been accepted for future transplantation?

- Yes
- No
- Do not know

d. If yes, please indicate the month and year of when the donor was identified.

|   |   |   |   |   |   |   |  |
|---|---|---|---|---|---|---|--|
|   |   | / |   |   |   |   |  |
| M | M |   | Y | Y | Y | Y |  |

14. Preparation for starting haemodialysis

*If several operations have been conducted, please provide information on the initial procedure.*

a. Has the patient had a vascular access procedure for haemodialysis?

- Yes
- No
- Do not know

b. If yes, please indicate the month and year of the operation.

|   |   |   |   |   |   |   |  |
|---|---|---|---|---|---|---|--|
|   |   | / |   |   |   |   |  |
| M | M |   | Y | Y | Y | Y |  |

c. If yes, please indicate type(s) of vascular access.

- Arteriovenous fistula
- Arteriovenous synthetic graft
- Central dialysis catheter

Cost of ADPKD patients at different stages of disease  
in the Nordic countries

| Site ID |  |  |
|---------|--|--|
|         |  |  |

| Subject ID |  |  |
|------------|--|--|
|            |  |  |

15. Preparation for starting peritoneal dialysis

*If several operations have been conducted, please provide information on the initial procedure.*

a. Has the patient had an access procedure for peritoneal dialysis?

- Yes
- No
- Do not know

b. If yes, please indicate the month and year of the operation.

|   |   |   |   |   |   |   |  |
|---|---|---|---|---|---|---|--|
|   |   | / |   |   |   |   |  |
| M | M |   | Y | Y | Y | Y |  |

16. Transplant failure

a. Has the subject had a kidney transplant failure (graft failure, transplant rejection)?

- Yes (primary non-function, technical failure, acute vascular events, hyper-acute rejection)
- Yes (acute rejection and/or severe inflammation)
- Yes (other reason than above)
- No
- Do not know

b. If yes, how was the graft failure handled?

*Select all that apply.*

- Dialysis treatment started
- Maintained graft
- Graft nephrectomy
- Re-transplantation (planned or performed)

Cost of ADPKD patients at different stages of disease  
in the Nordic countries

| Site ID |  |  |
|---------|--|--|
|         |  |  |

| Subject ID |  |  |
|------------|--|--|
|            |  |  |

---

**ADPKD-Related Medical Resource Use (Past 12 Months)**

---

17. Does the subject currently have and/or have been diagnosed in the past 12 months with any of the following medical conditions?

*(Select all that apply)*

- Abdominal hernia
- Anaemia
- Brain aneurysm
- Cancer
- Colonic diverticulitis
- Diabetes mellitus
- Haematuria (blood in urine)
- Hyperparathyroidism
- Hypertension
- Nephrolithiasis (kidney stones)
- Non-renal cysts
- Peritonitis
- Proteinuria
- Renal haemorrhage
- Renal pain
- Sepsis
- Upper urinary tract infection
- Vascular/Cardiac abnormalities
- Other diagnosis related to ADPKD or its complications, specify:  
\_\_\_\_\_
- None of the above

18. Medical surgeries/treatment procedures in the past 12 months

- a. In the past 12 months, did the subject have any medical surgeries/treatment procedures?

- Yes
- No
- Do not know

Cost of ADPKD patients at different stages of disease  
in the Nordic countries

**Site ID**

|  |  |  |
|--|--|--|
|  |  |  |
|--|--|--|

**Subject ID**

|  |  |  |
|--|--|--|
|  |  |  |
|--|--|--|

b. If yes, please provide details below.

| Surgery/procedure                                                                | Did the patient have the procedure in the past 12 months?                                           | Number of procedures over the past 12 months |
|----------------------------------------------------------------------------------|-----------------------------------------------------------------------------------------------------|----------------------------------------------|
| Acute blood transfusion                                                          | <input type="checkbox"/> Yes<br><input type="checkbox"/> No<br><input type="checkbox"/> Do not know | _  procedures                                |
| Brain aneurysm procedure                                                         | <input type="checkbox"/> Yes<br><input type="checkbox"/> No<br><input type="checkbox"/> Do not know | _  procedures                                |
| Heart surgery                                                                    | <input type="checkbox"/> Yes<br><input type="checkbox"/> No<br><input type="checkbox"/> Do not know | _  procedures                                |
| Hernia surgery (abdomen)                                                         | <input type="checkbox"/> Yes<br><input type="checkbox"/> No<br><input type="checkbox"/> Do not know | _  procedures                                |
| Peritonitis surgery                                                              | <input type="checkbox"/> Yes<br><input type="checkbox"/> No<br><input type="checkbox"/> Do not know | _  procedures                                |
| Removal of kidney stones                                                         | <input type="checkbox"/> Yes<br><input type="checkbox"/> No<br><input type="checkbox"/> Do not know | _  procedures                                |
| Removal of kidney (nephrectomy)                                                  | <input type="checkbox"/> Yes<br><input type="checkbox"/> No<br><input type="checkbox"/> Do not know | _  procedures                                |
| Reduction (partial) of kidney size                                               | <input type="checkbox"/> Yes<br><input type="checkbox"/> No<br><input type="checkbox"/> Do not know | _  procedures                                |
| Reduction (partial) of liver size                                                | <input type="checkbox"/> Yes<br><input type="checkbox"/> No<br><input type="checkbox"/> Do not know | _  procedures                                |
| Removal or puncture of non-renal cysts                                           | <input type="checkbox"/> Yes<br><input type="checkbox"/> No<br><input type="checkbox"/> Do not know | _  procedures                                |
| Removal or puncture of renal cysts                                               | <input type="checkbox"/> Yes<br><input type="checkbox"/> No<br><input type="checkbox"/> Do not know | _  procedures                                |
| Vascular access (for dialysis)                                                   | <input type="checkbox"/> Yes<br><input type="checkbox"/> No<br><input type="checkbox"/> Do not know | _  procedures                                |
| Other surgery/procedure related to ADPKD or its complications, specify:<br>_____ | <input type="checkbox"/> Yes<br><input type="checkbox"/> No<br><input type="checkbox"/> Do not know | _  procedures                                |

Cost of ADPKD patients at different stages of disease  
in the Nordic countries

**Site ID**

|  |  |  |
|--|--|--|
|  |  |  |
|--|--|--|

**Subject ID**

|  |  |  |
|--|--|--|
|  |  |  |
|--|--|--|

*If more room is required than the space provided, please use a separate piece of paper.*

19. Over the past 12 months, which of the following diagnostic tests to monitor ADPKD has the subject undergone?

*Specify the type and number of diagnostic tests over the past 12 months.*

| Diagnostic test             | Did the patient have a diagnostic test in the past 12 months?                                       | Number of tests over the past 12 months                                                                                                                                                   |  |  |
|-----------------------------|-----------------------------------------------------------------------------------------------------|-------------------------------------------------------------------------------------------------------------------------------------------------------------------------------------------|--|--|
| Abdomen/kidney CT/MRI/PET   | <input type="checkbox"/> Yes<br><input type="checkbox"/> No<br><input type="checkbox"/> Do not know | <table border="1" style="display: inline-table; margin-right: 10px;"> <tr> <td style="width: 30px; height: 20px;"></td> <td style="width: 30px; height: 20px;"></td> </tr> </table> tests |  |  |
|                             |                                                                                                     |                                                                                                                                                                                           |  |  |
| Abdomen/kidney ultrasound   | <input type="checkbox"/> Yes<br><input type="checkbox"/> No<br><input type="checkbox"/> Do not know | <table border="1" style="display: inline-table; margin-right: 10px;"> <tr> <td style="width: 30px; height: 20px;"></td> <td style="width: 30px; height: 20px;"></td> </tr> </table> tests |  |  |
|                             |                                                                                                     |                                                                                                                                                                                           |  |  |
| Blood test                  | <input type="checkbox"/> Yes<br><input type="checkbox"/> No<br><input type="checkbox"/> Do not know | <table border="1" style="display: inline-table; margin-right: 10px;"> <tr> <td style="width: 30px; height: 20px;"></td> <td style="width: 30px; height: 20px;"></td> </tr> </table> tests |  |  |
|                             |                                                                                                     |                                                                                                                                                                                           |  |  |
| Brain MRA (angiography)     | <input type="checkbox"/> Yes<br><input type="checkbox"/> No<br><input type="checkbox"/> Do not know | <table border="1" style="display: inline-table; margin-right: 10px;"> <tr> <td style="width: 30px; height: 20px;"></td> <td style="width: 30px; height: 20px;"></td> </tr> </table> tests |  |  |
|                             |                                                                                                     |                                                                                                                                                                                           |  |  |
| Chest X-ray                 | <input type="checkbox"/> Yes<br><input type="checkbox"/> No<br><input type="checkbox"/> Do not know | <table border="1" style="display: inline-table; margin-right: 10px;"> <tr> <td style="width: 30px; height: 20px;"></td> <td style="width: 30px; height: 20px;"></td> </tr> </table> tests |  |  |
|                             |                                                                                                     |                                                                                                                                                                                           |  |  |
| Echocardiography            | <input type="checkbox"/> Yes<br><input type="checkbox"/> No<br><input type="checkbox"/> Do not know | <table border="1" style="display: inline-table; margin-right: 10px;"> <tr> <td style="width: 30px; height: 20px;"></td> <td style="width: 30px; height: 20px;"></td> </tr> </table> tests |  |  |
|                             |                                                                                                     |                                                                                                                                                                                           |  |  |
| Urine dipstick test         | <input type="checkbox"/> Yes<br><input type="checkbox"/> No<br><input type="checkbox"/> Do not know | <table border="1" style="display: inline-table; margin-right: 10px;"> <tr> <td style="width: 30px; height: 20px;"></td> <td style="width: 30px; height: 20px;"></td> </tr> </table> tests |  |  |
|                             |                                                                                                     |                                                                                                                                                                                           |  |  |
| Urine lab test              | <input type="checkbox"/> Yes<br><input type="checkbox"/> No<br><input type="checkbox"/> Do not know | <table border="1" style="display: inline-table; margin-right: 10px;"> <tr> <td style="width: 30px; height: 20px;"></td> <td style="width: 30px; height: 20px;"></td> </tr> </table> tests |  |  |
|                             |                                                                                                     |                                                                                                                                                                                           |  |  |
| Other,<br>specify:<br>_____ | <input type="checkbox"/> Yes<br><input type="checkbox"/> No<br><input type="checkbox"/> Do not know | <table border="1" style="display: inline-table; margin-right: 10px;"> <tr> <td style="width: 30px; height: 20px;"></td> <td style="width: 30px; height: 20px;"></td> </tr> </table> tests |  |  |
|                             |                                                                                                     |                                                                                                                                                                                           |  |  |
| Other,<br>specify:<br>_____ | <input type="checkbox"/> Yes<br><input type="checkbox"/> No<br><input type="checkbox"/> Do not know | <table border="1" style="display: inline-table; margin-right: 10px;"> <tr> <td style="width: 30px; height: 20px;"></td> <td style="width: 30px; height: 20px;"></td> </tr> </table> tests |  |  |
|                             |                                                                                                     |                                                                                                                                                                                           |  |  |

*If more room is required than the space provided, please use a separate piece of paper.*

Cost of ADPKD patients at different stages of disease in the Nordic countries

| Site ID |  |  |
|---------|--|--|
|         |  |  |

| Subject ID |  |  |
|------------|--|--|
|            |  |  |

20. Hospitalisation

Exclude outpatient visits and dialysis visits

a. Over the past 12 months, has the subject been hospitalised directly related to ADPKD or its complications?

- Yes
- No
- Do not know

b. If yes, how many inpatient hospitalisations related to ADPKD and its complications did the subject have in the past 12 months?

|  |  |
|--|--|
|  |  |
|--|--|

 hospitalisations

c. If yes, how many hospital days did this/these hospitalisation(s) result in?

|  |  |
|--|--|
|  |  |
|--|--|

 hospital days

21. Outpatient visits

*Include all outpatient visits (for example visit with a specialist or follow-up visit).  
Exclude dialysis visits.*

a. Over the past 12 months, has the subject had any outpatient visits directly related to ADPKD or its complications in the hospital outpatient department?

- Yes
- No
- Do not know

b. If yes, how many outpatient visits did the subject have in the past 12 months?

|  |  |
|--|--|
|  |  |
|--|--|

 visits

Cost of ADPKD patients at different stages of disease  
in the Nordic countries

| Site ID |  |  |
|---------|--|--|
|         |  |  |

| Subject ID |  |  |
|------------|--|--|
|            |  |  |

---

**ADPKD-Related Medication Use (Past 12 Months)**

---

22. Hypertension medication

a. In the past 12 months, has the subject been receiving prescriptions provided for hypertension?

- Yes
- No
- Do not know

b. If yes, please provide the details of prescriptions provided for hypertension in the past 12 months.

**Site ID**

|  |  |  |
|--|--|--|
|  |  |  |
|--|--|--|

**Subject ID**

|  |  |  |
|--|--|--|
|  |  |  |
|--|--|--|

|                                                                                                                                                                                            |                                                                                                                                                                             |
|--------------------------------------------------------------------------------------------------------------------------------------------------------------------------------------------|-----------------------------------------------------------------------------------------------------------------------------------------------------------------------------|
| Has the subject received the following types of medication in the past 12 months?                                                                                                          | If yes, please indicate/write the name of medication(s), and the duration of treatment in the past 12 months (1-52 weeks)                                                   |
| <b>Angiotensin-Converting Enzyme (ACE) inhibitors</b><br><br><input type="checkbox"/> Yes<br><input type="checkbox"/> No<br><input type="checkbox"/> Do not know                           | <input type="checkbox"/> Enalapril <span style="float: right;">    weeks</span><br><br><input type="checkbox"/> Other: _____ <span style="float: right;">    weeks</span>   |
| <b>Angiotensin II receptor antagonists/angiotensin receptor blockers (ARBs)</b><br><br><input type="checkbox"/> Yes<br><input type="checkbox"/> No<br><input type="checkbox"/> Do not know | <input type="checkbox"/> Losartan <span style="float: right;">    weeks</span><br><br><input type="checkbox"/> Other: _____ <span style="float: right;">    weeks</span>    |
| <b>Alfa-blockers</b><br><br><input type="checkbox"/> Yes<br><input type="checkbox"/> No<br><input type="checkbox"/> Do not know                                                            | <input type="checkbox"/> Name: _____ <span style="float: right;">    weeks</span><br><br><input type="checkbox"/> Other: _____ <span style="float: right;">    weeks</span> |
| <b>Beta-blockers</b><br><br><input type="checkbox"/> Yes<br><input type="checkbox"/> No<br><input type="checkbox"/> Do not know                                                            | <input type="checkbox"/> Metoprolol <span style="float: right;">    weeks</span><br><br><input type="checkbox"/> Other: _____ <span style="float: right;">    weeks</span>  |
| <b>Calcium channel blockers/calcium antagonists</b><br><br><input type="checkbox"/> Yes<br><input type="checkbox"/> No<br><input type="checkbox"/> Do not know                             | <input type="checkbox"/> Amlodipine <span style="float: right;">    weeks</span>                                                                                            |



Cost of ADPKD patients at different stages of disease  
in the Nordic countries

**Site ID**

|  |  |  |
|--|--|--|
|  |  |  |
|--|--|--|

**Subject ID**

|  |  |  |
|--|--|--|
|  |  |  |
|--|--|--|

|                                                                                                                                           |                                                                                                                                                                             |
|-------------------------------------------------------------------------------------------------------------------------------------------|-----------------------------------------------------------------------------------------------------------------------------------------------------------------------------|
|                                                                                                                                           | <input type="checkbox"/> Felodipine <span style="float: right;">    weeks</span><br><br><input type="checkbox"/> Other: _____ <span style="float: right;">    weeks</span>  |
| <b>Loop diuretics</b><br><br><input type="checkbox"/> Yes<br><input type="checkbox"/> No<br><input type="checkbox"/> Do not know          | <input type="checkbox"/> Name: _____ <span style="float: right;">    weeks</span><br><br><input type="checkbox"/> Other: _____ <span style="float: right;">    weeks</span> |
| <b>Thiazides diuretics</b><br><br><input type="checkbox"/> Yes<br><input type="checkbox"/> No<br><input type="checkbox"/> Do not know     | <input type="checkbox"/> Name: _____ <span style="float: right;">    weeks</span><br><br><input type="checkbox"/> Other: _____ <span style="float: right;">    weeks</span> |
| <b>Other, not listed above</b><br><br><input type="checkbox"/> Yes<br><input type="checkbox"/> No<br><input type="checkbox"/> Do not know | <input type="checkbox"/> Name: _____ <span style="float: right;">    weeks</span><br><br><input type="checkbox"/> Other: _____ <span style="float: right;">    weeks</span> |

*If more room is required than the space provided, please use a separate piece of paper.*

23. Renal pain medication

a. In the past 12 months, has the subject been receiving prescriptions provided for renal pain to manage ADPKD?

- Yes
- No
- Do not know

**Site ID**

|  |  |  |
|--|--|--|
|  |  |  |
|--|--|--|

**Subject ID**

|  |  |  |
|--|--|--|
|  |  |  |
|--|--|--|

b. If yes, please provide the details of prescriptions provided for renal pain in the past 12 months.

| Has the subject received the following types of medication in the past 12 months?                                                                                            | If yes, please indicate/write the name of medication(s), and the duration of treatment in the past 12 months (1-52 weeks)                                                                                                                                                                                                                                                                                                                                                                                                                                                                                                          |
|------------------------------------------------------------------------------------------------------------------------------------------------------------------------------|------------------------------------------------------------------------------------------------------------------------------------------------------------------------------------------------------------------------------------------------------------------------------------------------------------------------------------------------------------------------------------------------------------------------------------------------------------------------------------------------------------------------------------------------------------------------------------------------------------------------------------|
| <p>Aspirin and nonsteroidal anti-inflammatory drugs, NSAIDS</p> <p><input type="checkbox"/> Yes<br/><input type="checkbox"/> No<br/><input type="checkbox"/> Do not know</p> | <p><input type="checkbox"/> Aspirin/acetylsalicylic acid (ASA) <span style="float: right;"> _  weeks</span></p> <p><input type="checkbox"/> Ibuprofen/naproxen/COX-2 or other NSAID <span style="float: right;"> _  weeks</span></p>                                                                                                                                                                                                                                                                                                                                                                                               |
| <p>Mild analgesics</p> <p><input type="checkbox"/> Yes<br/><input type="checkbox"/> No<br/><input type="checkbox"/> Do not know</p>                                          | <p><input type="checkbox"/> Paracetamol <span style="float: right;"> _  weeks</span></p> <p><input type="checkbox"/> Other: _____ <span style="float: right;"> _  weeks</span></p>                                                                                                                                                                                                                                                                                                                                                                                                                                                 |
| <p>Opioids</p> <p><input type="checkbox"/> Yes<br/><input type="checkbox"/> No<br/><input type="checkbox"/> Do not know</p>                                                  | <p><input type="checkbox"/> Buprenorphine <span style="float: right;"> _  weeks</span></p> <p><input type="checkbox"/> Codeine <span style="float: right;"> _  weeks</span></p> <p><input type="checkbox"/> Fentanyl <span style="float: right;"> _  weeks</span></p> <p><input type="checkbox"/> Morphine <span style="float: right;"> _  weeks</span></p> <p><input type="checkbox"/> Oxycodone <span style="float: right;"> _  weeks</span></p> <p><input type="checkbox"/> Tramadol <span style="float: right;"> _  weeks</span></p> <p><input type="checkbox"/> Other: _____ <span style="float: right;"> _  weeks</span></p> |

Cost of ADPKD patients at different stages of disease  
in the Nordic countries

**Site ID**

|  |  |  |
|--|--|--|
|  |  |  |
|--|--|--|

**Subject ID**

|  |  |  |
|--|--|--|
|  |  |  |
|--|--|--|

|                                                                                                                                                   |                                                                                                                                                                                          |
|---------------------------------------------------------------------------------------------------------------------------------------------------|------------------------------------------------------------------------------------------------------------------------------------------------------------------------------------------|
|                                                                                                                                                   |                                                                                                                                                                                          |
| <p>Other, not listed above</p> <p><input type="checkbox"/> Yes</p> <p><input type="checkbox"/> No</p> <p><input type="checkbox"/> Do not know</p> | <p><input type="checkbox"/> Name: _____</p> <p style="text-align: right;"> _____  weeks</p> <p><input type="checkbox"/> Other: _____</p> <p style="text-align: right;"> _____  weeks</p> |

*If more room is required than the space provided, please use a separate piece of paper.*

24. Immunosuppressive medication

a. In the past 12 months, has the subject been receiving immunosuppressive medication due to kidney transplant?

- Yes
- No
- Do not know

**Site ID**

|  |  |  |
|--|--|--|
|  |  |  |
|--|--|--|

**Subject ID**

|  |  |  |
|--|--|--|
|  |  |  |
|--|--|--|

b. If yes, please provide the details of immunosuppressive medication use in the past 12 months.

| Has the subject received the following types of medication in the past 12 months?                                                                                           | If yes, please indicate/write the name of medication(s), and the duration of treatment in the past 12 months (1-52 weeks)                                                                                                                                                                                                                                                                        |
|-----------------------------------------------------------------------------------------------------------------------------------------------------------------------------|--------------------------------------------------------------------------------------------------------------------------------------------------------------------------------------------------------------------------------------------------------------------------------------------------------------------------------------------------------------------------------------------------|
| <p>T-cell suppressive agents (CNIs or mTor-1 inhibitors)</p> <p><input type="checkbox"/> Yes<br/> <input type="checkbox"/> No<br/> <input type="checkbox"/> Do not know</p> | <p><input type="checkbox"/> Ciclosporin (CsA) <span style="float: right;">    weeks</span></p> <p><input type="checkbox"/> Sirolimus (SiR) <span style="float: right;">    weeks</span></p> <p><input type="checkbox"/> Tacrolimus (TAC) <span style="float: right;">    weeks</span></p> <p><input type="checkbox"/> Other: _____ <span style="float: right;">    weeks</span></p>              |
| <p>Cytotoxic agents (Anti-metabolites)</p> <p><input type="checkbox"/> Yes<br/> <input type="checkbox"/> No<br/> <input type="checkbox"/> Do not know</p>                   | <p><input type="checkbox"/> Azathioprine (AZA) <span style="float: right;">    weeks</span></p> <p><input type="checkbox"/> Cyclophosphamide <span style="float: right;">    weeks</span></p> <p><input type="checkbox"/> Mycophenolate mofetil (MMF) <span style="float: right;">    weeks</span></p> <p><input type="checkbox"/> Other: _____ <span style="float: right;">    weeks</span></p> |
| <p>Corticosteroids (cortisone)</p> <p><input type="checkbox"/> Yes<br/> <input type="checkbox"/> No<br/> <input type="checkbox"/> Do not know</p>                           | <p><input type="checkbox"/> Prednisolone <span style="float: right;">    weeks</span></p> <p><input type="checkbox"/> Other: _____ <span style="float: right;">    weeks</span></p>                                                                                                                                                                                                              |
| <p>Other immunosuppressive</p>                                                                                                                                              |                                                                                                                                                                                                                                                                                                                                                                                                  |

**Site ID**

|  |  |  |
|--|--|--|
|  |  |  |
|--|--|--|

**Subject ID**

|  |  |  |
|--|--|--|
|  |  |  |
|--|--|--|

|                                                                                                                                         |                                                                                                                                                                                                                                                                                                                                                                                                                                                                                                                                                                                                                                                                                                                             |                                                          |  |          |                                      |  |          |                                     |  |          |                                    |  |          |                                       |  |          |
|-----------------------------------------------------------------------------------------------------------------------------------------|-----------------------------------------------------------------------------------------------------------------------------------------------------------------------------------------------------------------------------------------------------------------------------------------------------------------------------------------------------------------------------------------------------------------------------------------------------------------------------------------------------------------------------------------------------------------------------------------------------------------------------------------------------------------------------------------------------------------------------|----------------------------------------------------------|--|----------|--------------------------------------|--|----------|-------------------------------------|--|----------|------------------------------------|--|----------|---------------------------------------|--|----------|
| Has the subject received the following types of medication in the past 12 months?                                                       | If yes, please indicate/write the name of medication(s), and the duration of treatment in the past 12 months (1-52 weeks)                                                                                                                                                                                                                                                                                                                                                                                                                                                                                                                                                                                                   |                                                          |  |          |                                      |  |          |                                     |  |          |                                    |  |          |                                       |  |          |
| medication, not listed above<br><br><input type="checkbox"/> Yes<br><input type="checkbox"/> No<br><input type="checkbox"/> Do not know | <table style="width: 100%; border-collapse: collapse;"> <tr> <td style="width: 60%;"><input type="checkbox"/> Anti-t-lymphocyte globulin, ATG</td> <td style="width: 10%;"></td> <td style="width: 30%; text-align: right;"> _  weeks</td> </tr> <tr> <td><input type="checkbox"/> Basiliximab</td> <td></td> <td style="text-align: right;"> _  weeks</td> </tr> <tr> <td><input type="checkbox"/> Belatacept</td> <td></td> <td style="text-align: right;"> _  weeks</td> </tr> <tr> <td><input type="checkbox"/> Rituximab</td> <td></td> <td style="text-align: right;"> _  weeks</td> </tr> <tr> <td><input type="checkbox"/> Other: _____</td> <td></td> <td style="text-align: right;"> _  weeks</td> </tr> </table> | <input type="checkbox"/> Anti-t-lymphocyte globulin, ATG |  | _  weeks | <input type="checkbox"/> Basiliximab |  | _  weeks | <input type="checkbox"/> Belatacept |  | _  weeks | <input type="checkbox"/> Rituximab |  | _  weeks | <input type="checkbox"/> Other: _____ |  | _  weeks |
| <input type="checkbox"/> Anti-t-lymphocyte globulin, ATG                                                                                |                                                                                                                                                                                                                                                                                                                                                                                                                                                                                                                                                                                                                                                                                                                             | _  weeks                                                 |  |          |                                      |  |          |                                     |  |          |                                    |  |          |                                       |  |          |
| <input type="checkbox"/> Basiliximab                                                                                                    |                                                                                                                                                                                                                                                                                                                                                                                                                                                                                                                                                                                                                                                                                                                             | _  weeks                                                 |  |          |                                      |  |          |                                     |  |          |                                    |  |          |                                       |  |          |
| <input type="checkbox"/> Belatacept                                                                                                     |                                                                                                                                                                                                                                                                                                                                                                                                                                                                                                                                                                                                                                                                                                                             | _  weeks                                                 |  |          |                                      |  |          |                                     |  |          |                                    |  |          |                                       |  |          |
| <input type="checkbox"/> Rituximab                                                                                                      |                                                                                                                                                                                                                                                                                                                                                                                                                                                                                                                                                                                                                                                                                                                             | _  weeks                                                 |  |          |                                      |  |          |                                     |  |          |                                    |  |          |                                       |  |          |
| <input type="checkbox"/> Other: _____                                                                                                   |                                                                                                                                                                                                                                                                                                                                                                                                                                                                                                                                                                                                                                                                                                                             | _  weeks                                                 |  |          |                                      |  |          |                                     |  |          |                                    |  |          |                                       |  |          |

*If more room is required than the space provided, please use a separate piece of paper.*

25. Other ADPKD-related medications

a. In the past 12 months, has the subject been receiving medications for other ADPKD-related conditions?

- Yes
- No
- Do not know

Cost of ADPKD patients at different stages of disease  
in the Nordic countries

**Site ID**

|  |  |  |
|--|--|--|
|  |  |  |
|--|--|--|

**Subject ID**

|  |  |  |
|--|--|--|
|  |  |  |
|--|--|--|

b. If yes, please provide the details of prescriptions provided for other ADPKD conditions in the past 12 months.

|                                                                                                                                         |                                                                                                                                                                                                                                                                                                                                                                                                                                                                                                 |
|-----------------------------------------------------------------------------------------------------------------------------------------|-------------------------------------------------------------------------------------------------------------------------------------------------------------------------------------------------------------------------------------------------------------------------------------------------------------------------------------------------------------------------------------------------------------------------------------------------------------------------------------------------|
| <p>Has the subject received the following types of medication in the past 12 months?</p>                                                | <p>If yes, please indicate/write the name of medication(s), and the duration of treatment in the past 12 months (1-52 weeks)</p>                                                                                                                                                                                                                                                                                                                                                                |
| <p>Phosphate binders</p> <p><input type="checkbox"/> Yes<br/> <input type="checkbox"/> No<br/> <input type="checkbox"/> Do not know</p> | <p><input type="checkbox"/> Sevelamer <span style="float: right;">    weeks</span></p> <p><input type="checkbox"/> Lanthanum carbonate <span style="float: right;">    weeks</span></p> <p><input type="checkbox"/> Calcium acetate/<br/>magnesium carbonate <span style="float: right;">    weeks</span></p> <p><input type="checkbox"/> Colestilan <span style="float: right;">    weeks</span></p> <p><input type="checkbox"/> Other: _____ <span style="float: right;">    weeks</span></p> |

Cost of ADPKD patients at different stages of disease  
in the Nordic countries

**Site ID**

|  |  |  |
|--|--|--|
|  |  |  |
|--|--|--|

**Subject ID**

|  |  |  |
|--|--|--|
|  |  |  |
|--|--|--|

| Type of prescription                     | Has the subject received this type of prescription in the past 12 months?                           | Duration of treatment during the past 12 months (1-52 weeks) |
|------------------------------------------|-----------------------------------------------------------------------------------------------------|--------------------------------------------------------------|
| Antibiotics                              | <input type="checkbox"/> Yes<br><input type="checkbox"/> No<br><input type="checkbox"/> Do not know | _  weeks                                                     |
| Antivirals                               | <input type="checkbox"/> Yes<br><input type="checkbox"/> No<br><input type="checkbox"/> Do not know | _  weeks                                                     |
| Bisphosphonates                          | <input type="checkbox"/> Yes<br><input type="checkbox"/> No<br><input type="checkbox"/> Do not know | _  weeks                                                     |
| Erythropoiesis-Stimulating Agents (ESAs) | <input type="checkbox"/> Yes<br><input type="checkbox"/> No<br><input type="checkbox"/> Do not know | _  weeks                                                     |
| Iron, oral                               | <input type="checkbox"/> Yes<br><input type="checkbox"/> No<br><input type="checkbox"/> Do not know | _  weeks                                                     |
| Iron, parenteral (IV)                    | <input type="checkbox"/> Yes<br><input type="checkbox"/> No<br><input type="checkbox"/> Do not know | _  weeks                                                     |
| Vitamin D analogs                        | <input type="checkbox"/> Yes<br><input type="checkbox"/> No<br><input type="checkbox"/> Do not know | _  weeks                                                     |
| Other, specify:<br>_____                 | <input type="checkbox"/> Yes<br><input type="checkbox"/> No<br><input type="checkbox"/> Do not know | _  weeks                                                     |

*If more room is required than the space provided, please use a separate piece of paper.*

Cost of ADPKD patients at different stages of disease  
in the Nordic countries

| Site ID |  |  |
|---------|--|--|
|         |  |  |

| Subject ID |  |  |
|------------|--|--|
|            |  |  |

---

**Dialysis-Related Resource Use (Past 12 Months)**

---

26. Regular dialysis

*Regular dialysis refers to dialysis due to chronic kidney disease (i.e. not temporary dialysis).  
Self-care-dialysis refers to when the patient manages dialysis at home/work.*

a. Over the past 12 months, has the subject received regular dialysis?

- Yes
- No
- Do not know



**Site ID**

|  |  |  |
|--|--|--|
|  |  |  |
|--|--|--|

**Subject ID**

|  |  |  |
|--|--|--|
|  |  |  |
|--|--|--|

b. If yes, please indicate, during the past 12 months, the initial type of dialysis, regimen, and duration.

| Type of dialysis                                                                                                                                     | Where did the subject receive dialysis in the past 12 months?                                                                    | Frequency of dialysis per week (1-7 times/week) or type of PD                                                                                                                                                                                                                                                 | Duration of being on dialysis during the past 12 months (1-52 weeks)                                                                                                                                                                                                                                       |  |          |                                                                                                                                                                                                                                                                                                            |  |  |       |
|------------------------------------------------------------------------------------------------------------------------------------------------------|----------------------------------------------------------------------------------------------------------------------------------|---------------------------------------------------------------------------------------------------------------------------------------------------------------------------------------------------------------------------------------------------------------------------------------------------------------|------------------------------------------------------------------------------------------------------------------------------------------------------------------------------------------------------------------------------------------------------------------------------------------------------------|--|----------|------------------------------------------------------------------------------------------------------------------------------------------------------------------------------------------------------------------------------------------------------------------------------------------------------------|--|--|-------|
| <b>Haemodialysis (HD)</b><br><br><input type="checkbox"/> Yes<br><input type="checkbox"/> No<br><input type="checkbox"/> Do not know                 | <input type="checkbox"/> Home/Self-care<br><input type="checkbox"/> Home/Assisted<br><input type="checkbox"/> At clinic/hospital | <table style="width: 100%; border: none;"> <tr> <td style="border: none; width: 40px; height: 20px; border-bottom: 1px solid black;"></td> <td style="border: none; width: 40px; height: 20px; border-bottom: 1px solid black;"></td> <td style="border: none; padding: 0 10px;">per week</td> </tr> </table> |                                                                                                                                                                                                                                                                                                            |  | per week | <table style="width: 100%; border: none;"> <tr> <td style="border: none; width: 40px; height: 20px; border-bottom: 1px solid black;"></td> <td style="border: none; width: 40px; height: 20px; border-bottom: 1px solid black;"></td> <td style="border: none; padding: 0 10px;">weeks</td> </tr> </table> |  |  | weeks |
|                                                                                                                                                      |                                                                                                                                  | per week                                                                                                                                                                                                                                                                                                      |                                                                                                                                                                                                                                                                                                            |  |          |                                                                                                                                                                                                                                                                                                            |  |  |       |
|                                                                                                                                                      |                                                                                                                                  | weeks                                                                                                                                                                                                                                                                                                         |                                                                                                                                                                                                                                                                                                            |  |          |                                                                                                                                                                                                                                                                                                            |  |  |       |
| <b>Peritoneal dialysis (PD)</b><br><br><input type="checkbox"/> Yes<br><input type="checkbox"/> No<br><input type="checkbox"/> Do not know           | <input type="checkbox"/> Home/Self-care<br><input type="checkbox"/> Home/Assisted<br><input type="checkbox"/> At clinic/hospital | <input type="checkbox"/> Continuous ambulatory peritoneal dialysis (CAPD)<br><input type="checkbox"/> Automated peritoneal dialysis (APD)<br><input type="checkbox"/> Do not know                                                                                                                             | <table style="width: 100%; border: none;"> <tr> <td style="border: none; width: 40px; height: 20px; border-bottom: 1px solid black;"></td> <td style="border: none; width: 40px; height: 20px; border-bottom: 1px solid black;"></td> <td style="border: none; padding: 0 10px;">weeks</td> </tr> </table> |  |          | weeks                                                                                                                                                                                                                                                                                                      |  |  |       |
|                                                                                                                                                      |                                                                                                                                  | weeks                                                                                                                                                                                                                                                                                                         |                                                                                                                                                                                                                                                                                                            |  |          |                                                                                                                                                                                                                                                                                                            |  |  |       |
| <p><u>If the patient changed type of dialysis or frequency during the past 12 months, please indicate the new type/frequency/duration below:</u></p> |                                                                                                                                  |                                                                                                                                                                                                                                                                                                               |                                                                                                                                                                                                                                                                                                            |  |          |                                                                                                                                                                                                                                                                                                            |  |  |       |
| Type of dialysis                                                                                                                                     | Where did the subject receive dialysis in the past 12 months?                                                                    | Frequency of dialysis per week (1-7 times/week) or type of PD                                                                                                                                                                                                                                                 | Duration of being on dialysis during the past 12 months (1-52 weeks)                                                                                                                                                                                                                                       |  |          |                                                                                                                                                                                                                                                                                                            |  |  |       |
| <b>Haemodialysis (HD)</b><br><br><input type="checkbox"/> Yes<br><input type="checkbox"/> No<br><input type="checkbox"/> Do not know                 | <input type="checkbox"/> Home/Self-care<br><input type="checkbox"/> Home/Assisted<br><input type="checkbox"/> At clinic/hospital | <table style="width: 100%; border: none;"> <tr> <td style="border: none; width: 40px; height: 20px; border-bottom: 1px solid black;"></td> <td style="border: none; width: 40px; height: 20px; border-bottom: 1px solid black;"></td> <td style="border: none; padding: 0 10px;">per week</td> </tr> </table> |                                                                                                                                                                                                                                                                                                            |  | per week | <table style="width: 100%; border: none;"> <tr> <td style="border: none; width: 40px; height: 20px; border-bottom: 1px solid black;"></td> <td style="border: none; width: 40px; height: 20px; border-bottom: 1px solid black;"></td> <td style="border: none; padding: 0 10px;">weeks</td> </tr> </table> |  |  | weeks |
|                                                                                                                                                      |                                                                                                                                  | per week                                                                                                                                                                                                                                                                                                      |                                                                                                                                                                                                                                                                                                            |  |          |                                                                                                                                                                                                                                                                                                            |  |  |       |
|                                                                                                                                                      |                                                                                                                                  | weeks                                                                                                                                                                                                                                                                                                         |                                                                                                                                                                                                                                                                                                            |  |          |                                                                                                                                                                                                                                                                                                            |  |  |       |
| <b>Peritoneal dialysis (PD)</b><br><br><input type="checkbox"/> Yes<br><input type="checkbox"/> No<br><input type="checkbox"/> Do not know           | <input type="checkbox"/> Home/Self-care<br><input type="checkbox"/> Home/Assisted<br><input type="checkbox"/> At clinic/hospital | <input type="checkbox"/> Continuous ambulatory peritoneal dialysis (CAPD)<br><input type="checkbox"/> Automated peritoneal dialysis (APD)<br><input type="checkbox"/> Do not know                                                                                                                             | <table style="width: 100%; border: none;"> <tr> <td style="border: none; width: 40px; height: 20px; border-bottom: 1px solid black;"></td> <td style="border: none; width: 40px; height: 20px; border-bottom: 1px solid black;"></td> <td style="border: none; padding: 0 10px;">weeks</td> </tr> </table> |  |          | weeks                                                                                                                                                                                                                                                                                                      |  |  |       |
|                                                                                                                                                      |                                                                                                                                  | weeks                                                                                                                                                                                                                                                                                                         |                                                                                                                                                                                                                                                                                                            |  |          |                                                                                                                                                                                                                                                                                                            |  |  |       |

*If more room is required than the space provided, please use a separate piece of paper.*

Cost of ADPKD patients at different stages of disease  
in the Nordic countries

| Site ID |  |  |
|---------|--|--|
|         |  |  |

| Subject ID |  |  |
|------------|--|--|
|            |  |  |

---

**Additional Questions in Part II and III**

---

*The next two parts (Part II and Part III) collect additional information on subjects enrolled into the Dialysis and Transplant stratum, respectively.*

27. Is the subject enrolled into the:
- a. ... *Dialysis stratum* (on dialysis initiated at least 6 months ago; with/without transplanted kidney)?
    - Yes (continue with Q28)
    - No
  
  - b. ... *Transplant stratum* (working transplanted kidney since at least 6 months ago; not on dialysis)?
    - Yes (skip *Part II* and continue with Q33)
    - No
  
  - c. ... *CDK stage 4–5* or *CDK stage 1–3* stratum (not currently on dialysis/no previous transplant)?
    - Yes (skip *Parts II and III* and continue to the last page, Q40)
    - No

Cost of ADPKD patients at different stages of disease  
in the Nordic countries

| Site ID |  |  |
|---------|--|--|
|         |  |  |

| Subject ID |  |  |
|------------|--|--|
|            |  |  |

# Part II

## Period around Initiation of Dialysis

Strata: *Dialysis*

| Site ID |  |  |
|---------|--|--|
|         |  |  |

| Subject ID |  |  |
|------------|--|--|
|            |  |  |

---

**Dialysis-Related Resource Use (Period around Initiation of Dialysis)**

---

*This following section refers to resource use around the time of initiation of regular dialysis (6 months before until 6 months after dialysis initiation).*

*If the patient has been on and off regular dialysis, refer to the most recent time the patient initiated dialysis.*

28. Days of interest around start of dialysis

a. What was the date of dialysis initiation?

Dialysis date

|   |   |   |   |   |   |   |   |   |   |
|---|---|---|---|---|---|---|---|---|---|
|   |   | / |   |   | / |   |   |   |   |
| D | D |   | M | M |   | Y | Y | Y | Y |

b. Subtract 6 months from the dialysis date above

*Used as start date for data collection around dialysis start*

Date 6 months before dialysis  
(Start date)

|   |   |   |   |   |   |   |   |   |   |
|---|---|---|---|---|---|---|---|---|---|
|   |   | / |   |   | / |   |   |   |   |
| D | D |   | M | M |   | Y | Y | Y | Y |

c. Add 6 months to the dialysis date above

*Used as end date for data collection around dialysis start*

Date 6 months after dialysis  
(End date)

|   |   |   |   |   |   |   |   |   |   |
|---|---|---|---|---|---|---|---|---|---|
|   |   | / |   |   | / |   |   |   |   |
| D | D |   | M | M |   | Y | Y | Y | Y |

29. Resource use around dialysis start

*In the table that follows, please state the subject's hospitalisations and outpatient visits in the period around dialysis start. Please note that the first part of the table refers to the period before dialysis start whereas the second part of the table refers to the period after dialysis start.*

Cost of ADPKD patients at different stages of disease  
in the Nordic countries

**Site ID**

|  |  |  |
|--|--|--|
|  |  |  |
|--|--|--|

**Subject ID**

|  |  |  |
|--|--|--|
|  |  |  |
|--|--|--|

|                                                                                                            | Has the subject had the resource use type described below?                                          | If <u>yes</u> , how many hospitalisations/ outpatient visits?                                                                                                                                           | If <u>any hospitalisations</u> , how many hospital days did this/these hospitalisation/s result in? |  |  |                                                                                                                                                                                             |  |  |  |
|------------------------------------------------------------------------------------------------------------|-----------------------------------------------------------------------------------------------------|---------------------------------------------------------------------------------------------------------------------------------------------------------------------------------------------------------|-----------------------------------------------------------------------------------------------------|--|--|---------------------------------------------------------------------------------------------------------------------------------------------------------------------------------------------|--|--|--|
| <b>Before dialysis start, i.e. period <u>6 months before dialysis start</u> (Start date–Dialysis Date)</b> |                                                                                                     |                                                                                                                                                                                                         |                                                                                                     |  |  |                                                                                                                                                                                             |  |  |  |
| Hospitalisations<br><i><u>Exclude</u> outpatient visits</i>                                                | <input type="checkbox"/> Yes<br><input type="checkbox"/> No<br><input type="checkbox"/> Do not know | <table border="1" style="width: 60px; height: 20px; margin: 0 auto;"> <tr> <td style="width: 20px;"></td> <td style="width: 20px;"></td> <td style="width: 20px;"></td> </tr> </table> hospitalisations |                                                                                                     |  |  | <table border="1" style="width: 60px; height: 20px; margin: 0 auto;"> <tr> <td style="width: 20px;"></td> <td style="width: 20px;"></td> <td style="width: 20px;"></td> </tr> </table> days |  |  |  |
|                                                                                                            |                                                                                                     |                                                                                                                                                                                                         |                                                                                                     |  |  |                                                                                                                                                                                             |  |  |  |
|                                                                                                            |                                                                                                     |                                                                                                                                                                                                         |                                                                                                     |  |  |                                                                                                                                                                                             |  |  |  |
| Outpatient visits<br><i><u>Exclude</u> hospitalisations</i>                                                | <input type="checkbox"/> Yes<br><input type="checkbox"/> No<br><input type="checkbox"/> Do not know | <table border="1" style="width: 60px; height: 20px; margin: 0 auto;"> <tr> <td style="width: 20px;"></td> <td style="width: 20px;"></td> <td style="width: 20px;"></td> </tr> </table> visits           |                                                                                                     |  |  |                                                                                                                                                                                             |  |  |  |
|                                                                                                            |                                                                                                     |                                                                                                                                                                                                         |                                                                                                     |  |  |                                                                                                                                                                                             |  |  |  |
| <b>After dialysis start, i.e. the period <u>6 months after dialysis start</u> (Dialysis Date–End Date)</b> |                                                                                                     |                                                                                                                                                                                                         |                                                                                                     |  |  |                                                                                                                                                                                             |  |  |  |
| Hospitalisations<br><i><u>Exclude</u> outpatient visits<br/>Also <u>exclude</u> dialysis visits</i>        | <input type="checkbox"/> Yes<br><input type="checkbox"/> No<br><input type="checkbox"/> Do not know | <table border="1" style="width: 60px; height: 20px; margin: 0 auto;"> <tr> <td style="width: 20px;"></td> <td style="width: 20px;"></td> <td style="width: 20px;"></td> </tr> </table> hospitalisations |                                                                                                     |  |  | <table border="1" style="width: 60px; height: 20px; margin: 0 auto;"> <tr> <td style="width: 20px;"></td> <td style="width: 20px;"></td> <td style="width: 20px;"></td> </tr> </table> days |  |  |  |
|                                                                                                            |                                                                                                     |                                                                                                                                                                                                         |                                                                                                     |  |  |                                                                                                                                                                                             |  |  |  |
|                                                                                                            |                                                                                                     |                                                                                                                                                                                                         |                                                                                                     |  |  |                                                                                                                                                                                             |  |  |  |
| Outpatient visits<br><i><u>Exclude</u> hospitalisations<br/>Also <u>exclude</u> dialysis visits</i>        | <input type="checkbox"/> Yes<br><input type="checkbox"/> No<br><input type="checkbox"/> Do not know | <table border="1" style="width: 60px; height: 20px; margin: 0 auto;"> <tr> <td style="width: 20px;"></td> <td style="width: 20px;"></td> <td style="width: 20px;"></td> </tr> </table> visits           |                                                                                                     |  |  |                                                                                                                                                                                             |  |  |  |
|                                                                                                            |                                                                                                     |                                                                                                                                                                                                         |                                                                                                     |  |  |                                                                                                                                                                                             |  |  |  |

**Site ID**

|  |  |  |
|--|--|--|
|  |  |  |
|--|--|--|

**Subject ID**

|  |  |  |
|--|--|--|
|  |  |  |
|--|--|--|

30. Indicate the initial type of dialysis and regimen during the 6 months after dialysis start.

|                                                                                                                                                                    |                                                                                                                                  |                                                                                                                                                                                   |                                            |
|--------------------------------------------------------------------------------------------------------------------------------------------------------------------|----------------------------------------------------------------------------------------------------------------------------------|-----------------------------------------------------------------------------------------------------------------------------------------------------------------------------------|--------------------------------------------|
| Type of dialysis                                                                                                                                                   | Where did the subject receive dialysis?                                                                                          | Frequency of dialysis per week (1-7 times/week) or type of PD                                                                                                                     | Duration of being on dialysis (1-26 weeks) |
| Haemodialysis (HD)<br><br><input type="checkbox"/> Yes<br><input type="checkbox"/> No<br><input type="checkbox"/> Do not know                                      | <input type="checkbox"/> Home/Self-care<br><input type="checkbox"/> Home/Assisted<br><input type="checkbox"/> At clinic/hospital | _____ per week                                                                                                                                                                    | _____ weeks                                |
| Peritoneal dialysis (PD)<br><br><input type="checkbox"/> Yes<br><input type="checkbox"/> No<br><input type="checkbox"/> Do not know                                | <input type="checkbox"/> Home/Self-care<br><input type="checkbox"/> Home/Assisted<br><input type="checkbox"/> At clinic/hospital | <input type="checkbox"/> Continuous ambulatory peritoneal dialysis (CAPD)<br><input type="checkbox"/> Automated peritoneal dialysis (APD)<br><input type="checkbox"/> Do not know | _____ weeks                                |
| If the patient changed the type of dialysis or frequency in the 6-month period <u>after</u> dialysis start, please indicate the new type/frequency/duration below: |                                                                                                                                  |                                                                                                                                                                                   |                                            |
| Type of dialysis                                                                                                                                                   | Where did the subject receive dialysis?                                                                                          | Frequency of dialysis per week (1-7 times/week) or type of PD                                                                                                                     | Duration of being on dialysis (1-26 weeks) |
| Haemodialysis (HD)<br><br><input type="checkbox"/> Yes<br><input type="checkbox"/> No<br><input type="checkbox"/> Do not know                                      | <input type="checkbox"/> Home/Self-care<br><input type="checkbox"/> Home/Assisted<br><input type="checkbox"/> At clinic/hospital | _____ per week                                                                                                                                                                    | _____ weeks                                |
| Peritoneal dialysis (PD)<br><br><input type="checkbox"/> Yes<br><input type="checkbox"/> No<br><input type="checkbox"/> Do not know                                | <input type="checkbox"/> Home/Self-care<br><input type="checkbox"/> Home/Assisted<br><input type="checkbox"/> At clinic/hospital | <input type="checkbox"/> Continuous ambulatory peritoneal dialysis (CAPD)<br><input type="checkbox"/> Automated peritoneal dialysis (APD)<br><input type="checkbox"/> Do not know | _____ weeks                                |

*If more room is required than the space provided, please use a separate piece of paper.*

31. Medical surgeries/treatment procedures in the 6 months before dialysis start

a. In the 6 months before dialysis start, did the subject have any medical surgeries/treatment procedures?

- Yes
- No
- Do not know

Cost of ADPKD patients at different stages of disease  
in the Nordic countries

**Site ID**

|  |  |  |
|--|--|--|
|  |  |  |
|--|--|--|

**Subject ID**

|  |  |  |
|--|--|--|
|  |  |  |
|--|--|--|

b. If yes, please provide details below.

| Surgery/procedure                                                                | Did the patient have the procedure in the 6 months <u>before</u> dialysis start?                    | Number of procedures in the 6-month period |
|----------------------------------------------------------------------------------|-----------------------------------------------------------------------------------------------------|--------------------------------------------|
| Acute blood transfusion                                                          | <input type="checkbox"/> Yes<br><input type="checkbox"/> No<br><input type="checkbox"/> Do not know | _  procedures                              |
| Brain aneurysm procedure                                                         | <input type="checkbox"/> Yes<br><input type="checkbox"/> No<br><input type="checkbox"/> Do not know | _  procedures                              |
| Heart surgery                                                                    | <input type="checkbox"/> Yes<br><input type="checkbox"/> No<br><input type="checkbox"/> Do not know | _  procedures                              |
| Hernia surgery (abdomen)                                                         | <input type="checkbox"/> Yes<br><input type="checkbox"/> No<br><input type="checkbox"/> Do not know | _  procedures                              |
| Peritonitis surgery                                                              | <input type="checkbox"/> Yes<br><input type="checkbox"/> No<br><input type="checkbox"/> Do not know | _  procedures                              |
| Removal of kidney stones                                                         | <input type="checkbox"/> Yes<br><input type="checkbox"/> No<br><input type="checkbox"/> Do not know | _  procedures                              |
| Removal of kidney (nephrectomy)                                                  | <input type="checkbox"/> Yes<br><input type="checkbox"/> No<br><input type="checkbox"/> Do not know | _  procedures                              |
| Reduction (partial) of kidney size                                               | <input type="checkbox"/> Yes<br><input type="checkbox"/> No<br><input type="checkbox"/> Do not know | _  procedures                              |
| Reduction (partial) of liver size                                                | <input type="checkbox"/> Yes<br><input type="checkbox"/> No<br><input type="checkbox"/> Do not know | _  procedures                              |
| Removal or puncture of non-renal cysts                                           | <input type="checkbox"/> Yes<br><input type="checkbox"/> No<br><input type="checkbox"/> Do not know | _  procedures                              |
| Removal or puncture of renal cysts                                               | <input type="checkbox"/> Yes<br><input type="checkbox"/> No<br><input type="checkbox"/> Do not know | _  procedures                              |
| Vascular access (for dialysis)                                                   | <input type="checkbox"/> Yes<br><input type="checkbox"/> No<br><input type="checkbox"/> Do not know | _  procedures                              |
| Other surgery/procedure related to ADPKD or its complications, specify:<br>_____ | <input type="checkbox"/> Yes<br><input type="checkbox"/> No<br><input type="checkbox"/> Do not know | _  procedures                              |

Cost of ADPKD patients at different stages of disease  
in the Nordic countries

| Site ID |  |  |
|---------|--|--|
|         |  |  |

| Subject ID |  |  |
|------------|--|--|
|            |  |  |

*If more room is required than the space provided, please use a separate piece of paper.*

32. Medical surgeries/treatment procedures in the 6 months after dialysis start

a. In the 6 months after dialysis start, did the subject have any medical surgeries/treatment procedures?

- Yes
- No
- Do not know



**Site ID**

|  |  |  |
|--|--|--|
|  |  |  |
|--|--|--|

**Subject ID**

|  |  |  |
|--|--|--|
|  |  |  |
|--|--|--|

b. If yes, please provide details below.

| Surgery/procedure                                                                | Did the patient have the procedure in the 6 months <u>after</u> dialysis start?                     | Number of procedures in the 6-month period |
|----------------------------------------------------------------------------------|-----------------------------------------------------------------------------------------------------|--------------------------------------------|
| Acute blood transfusion                                                          | <input type="checkbox"/> Yes<br><input type="checkbox"/> No<br><input type="checkbox"/> Do not know | _  procedures                              |
| Brain aneurysm procedure                                                         | <input type="checkbox"/> Yes<br><input type="checkbox"/> No<br><input type="checkbox"/> Do not know | _  procedures                              |
| Heart surgery                                                                    | <input type="checkbox"/> Yes<br><input type="checkbox"/> No<br><input type="checkbox"/> Do not know | _  procedures                              |
| Hernia surgery (abdomen)                                                         | <input type="checkbox"/> Yes<br><input type="checkbox"/> No<br><input type="checkbox"/> Do not know | _  procedures                              |
| Peritonitis surgery                                                              | <input type="checkbox"/> Yes<br><input type="checkbox"/> No<br><input type="checkbox"/> Do not know | _  procedures                              |
| Removal of kidney stones                                                         | <input type="checkbox"/> Yes<br><input type="checkbox"/> No<br><input type="checkbox"/> Do not know | _  procedures                              |
| Removal of kidney (nephrectomy)                                                  | <input type="checkbox"/> Yes<br><input type="checkbox"/> No<br><input type="checkbox"/> Do not know | _  procedures                              |
| Reduction (partial) of kidney size                                               | <input type="checkbox"/> Yes<br><input type="checkbox"/> No<br><input type="checkbox"/> Do not know | _  procedures                              |
| Reduction (partial) of liver size                                                | <input type="checkbox"/> Yes<br><input type="checkbox"/> No<br><input type="checkbox"/> Do not know | _  procedures                              |
| Removal or puncture of non-renal cysts                                           | <input type="checkbox"/> Yes<br><input type="checkbox"/> No<br><input type="checkbox"/> Do not know | _  procedures                              |
| Removal or puncture of renal cysts                                               | <input type="checkbox"/> Yes<br><input type="checkbox"/> No<br><input type="checkbox"/> Do not know | _  procedures                              |
| Vascular access (for dialysis)                                                   | <input type="checkbox"/> Yes<br><input type="checkbox"/> No<br><input type="checkbox"/> Do not know | _  procedures                              |
| Other surgery/procedure related to ADPKD or its complications, specify:<br>_____ | <input type="checkbox"/> Yes<br><input type="checkbox"/> No<br><input type="checkbox"/> Do not know | _  procedures                              |

Cost of ADPKD patients at different stages of disease  
in the Nordic countries

| Site ID |  |  |
|---------|--|--|
|         |  |  |

| Subject ID |  |  |
|------------|--|--|
|            |  |  |

*If more room is required than the space provided, please use a separate piece of paper.*

***If you have filled out this section for a subject enrolled into the Dialysis strata, please skip Part III and continue to the last page (Q40).***

Cost of ADPKD patients at different stages of disease  
in the Nordic countries

| Site ID |  |  |
|---------|--|--|
|         |  |  |

| Subject ID |  |  |
|------------|--|--|
|            |  |  |

# Part III: Period around Transplant Operation

Strata: *Transplant*

Cost of ADPKD patients at different stages of disease  
in the Nordic countries

| Site ID |  |  |
|---------|--|--|
|         |  |  |

| Subject ID |  |  |
|------------|--|--|
|            |  |  |

---

**Kidney Transplant-Related Resource Use (Period around the Transplant Operation)**

---

*This section refers to resource use around the time of kidney transplant.  
If the patient has been re-transplanted, refer to the most recent kidney transplant.*

33. Days of interest around transplant

a. What was the date of transplant?

Transplant date

|   |   |   |   |   |   |   |   |   |   |
|---|---|---|---|---|---|---|---|---|---|
|   |   | / |   |   | / |   |   |   |   |
| D | D |   | M | M |   | Y | Y | Y | Y |

b. Subtract 6 months from the transplant date above

*Used as start date for data collection around transplant*

Date 6 months before transplant  
(Start date)

|   |   |   |   |   |   |   |   |   |   |
|---|---|---|---|---|---|---|---|---|---|
|   |   | / |   |   | / |   |   |   |   |
| D | D |   | M | M |   | Y | Y | Y | Y |

c. Add 6 months to the transplant date above

*Used as end date for data collection around transplant*

Date 6 months after transplant  
(End date)

|   |   |   |   |   |   |   |   |   |   |
|---|---|---|---|---|---|---|---|---|---|
|   |   | / |   |   | / |   |   |   |   |
| D | D |   | M | M |   | Y | Y | Y | Y |

34. Resource use around transplantation

*In the below table please state the subject's hospitalisations and outpatient visits in the period around transplantation. Please note that the first part of the table refers to the period before transplantation whereas the second part of the table refers to the period after the subject had his/her transplant.*

**Site ID**

|  |  |  |
|--|--|--|
|  |  |  |
|--|--|--|

**Subject ID**

|  |  |  |
|--|--|--|
|  |  |  |
|--|--|--|

|                                                                                                                |                                                                                                     |                                                                                                                                                                                                                                                        |                                                                                                     |   |                  |                                                                                                                                                                                                                                            |   |   |      |
|----------------------------------------------------------------------------------------------------------------|-----------------------------------------------------------------------------------------------------|--------------------------------------------------------------------------------------------------------------------------------------------------------------------------------------------------------------------------------------------------------|-----------------------------------------------------------------------------------------------------|---|------------------|--------------------------------------------------------------------------------------------------------------------------------------------------------------------------------------------------------------------------------------------|---|---|------|
|                                                                                                                | Has the subject had the resource use type described below?                                          | If <u>yes</u> , how many hospitalisations/ outpatient visits?                                                                                                                                                                                          | If <u>any hospitalisations</u> , how many hospital days did this/these hospitalisation/s result in? |   |                  |                                                                                                                                                                                                                                            |   |   |      |
| <b>Before transplantation, i.e. period <u>6 months before transplantation</u> (Start date–Transplant Date)</b> |                                                                                                     |                                                                                                                                                                                                                                                        |                                                                                                     |   |                  |                                                                                                                                                                                                                                            |   |   |      |
| Hospitalisations<br><br><i><u>Exclude</u> outpatient visits</i><br><i>Also <u>exclude</u> dialysis visits</i>  | <input type="checkbox"/> Yes<br><input type="checkbox"/> No<br><input type="checkbox"/> Do not know | <table style="width: 100%; border: none;"> <tr> <td style="border: none; width: 40px; text-align: center;"> _ </td> <td style="border: none; width: 40px; text-align: center;"> _ </td> <td style="border: none;">hospitalisations</td> </tr> </table> | _                                                                                                   | _ | hospitalisations | <table style="width: 100%; border: none;"> <tr> <td style="border: none; width: 40px; text-align: center;"> _ </td> <td style="border: none; width: 40px; text-align: center;"> _ </td> <td style="border: none;">days</td> </tr> </table> | _ | _ | days |
| _                                                                                                              | _                                                                                                   | hospitalisations                                                                                                                                                                                                                                       |                                                                                                     |   |                  |                                                                                                                                                                                                                                            |   |   |      |
| _                                                                                                              | _                                                                                                   | days                                                                                                                                                                                                                                                   |                                                                                                     |   |                  |                                                                                                                                                                                                                                            |   |   |      |
| Outpatient visits<br><br><i><u>Exclude</u> hospitalisations</i><br><i>Also <u>exclude</u> dialysis visits</i>  | <input type="checkbox"/> Yes<br><input type="checkbox"/> No<br><input type="checkbox"/> Do not know | <table style="width: 100%; border: none;"> <tr> <td style="border: none; width: 40px; text-align: center;"> _ </td> <td style="border: none; width: 40px; text-align: center;"> _ </td> <td style="border: none;">visits</td> </tr> </table>           | _                                                                                                   | _ | visits           |                                                                                                                                                                                                                                            |   |   |      |
| _                                                                                                              | _                                                                                                   | visits                                                                                                                                                                                                                                                 |                                                                                                     |   |                  |                                                                                                                                                                                                                                            |   |   |      |
| <b>After transplantation, i.e. the period <u>6 months after transplantation</u> (Transplant Date–End Date)</b> |                                                                                                     |                                                                                                                                                                                                                                                        |                                                                                                     |   |                  |                                                                                                                                                                                                                                            |   |   |      |
| Hospitalisations<br><br><i><u>Exclude</u> outpatient visits</i><br><i>Also <u>exclude</u> dialysis visits</i>  | <input type="checkbox"/> Yes<br><input type="checkbox"/> No<br><input type="checkbox"/> Do not know | <table style="width: 100%; border: none;"> <tr> <td style="border: none; width: 40px; text-align: center;"> _ </td> <td style="border: none; width: 40px; text-align: center;"> _ </td> <td style="border: none;">hospitalisations</td> </tr> </table> | _                                                                                                   | _ | hospitalisations | <table style="width: 100%; border: none;"> <tr> <td style="border: none; width: 40px; text-align: center;"> _ </td> <td style="border: none; width: 40px; text-align: center;"> _ </td> <td style="border: none;">days</td> </tr> </table> | _ | _ | days |
| _                                                                                                              | _                                                                                                   | hospitalisations                                                                                                                                                                                                                                       |                                                                                                     |   |                  |                                                                                                                                                                                                                                            |   |   |      |
| _                                                                                                              | _                                                                                                   | days                                                                                                                                                                                                                                                   |                                                                                                     |   |                  |                                                                                                                                                                                                                                            |   |   |      |
| Outpatient visits<br><br><i><u>Exclude</u> hospitalisations</i><br><i>Also <u>exclude</u> dialysis visits</i>  | <input type="checkbox"/> Yes<br><input type="checkbox"/> No<br><input type="checkbox"/> Do not know | <table style="width: 100%; border: none;"> <tr> <td style="border: none; width: 40px; text-align: center;"> _ </td> <td style="border: none; width: 40px; text-align: center;"> _ </td> <td style="border: none;">visits</td> </tr> </table>           | _                                                                                                   | _ | visits           |                                                                                                                                                                                                                                            |   |   |      |
| _                                                                                                              | _                                                                                                   | visits                                                                                                                                                                                                                                                 |                                                                                                     |   |                  |                                                                                                                                                                                                                                            |   |   |      |

35. Medical surgeries/treatment procedures in the 6 months before transplantation

a. In the 6 months before transplantation, did the subject have any medical surgeries/treatment procedures?

- Yes
- No
- Do not know

**Site ID**

|  |  |  |
|--|--|--|
|  |  |  |
|--|--|--|

**Subject ID**

|  |  |  |
|--|--|--|
|  |  |  |
|--|--|--|

b. If yes, please provide details below.

| Surgery/procedure                                                                | Did the patient have the procedure in the 6 months <u>before</u> transplantation?                   | Number of procedures in the 6-month period |
|----------------------------------------------------------------------------------|-----------------------------------------------------------------------------------------------------|--------------------------------------------|
| Acute blood transfusion                                                          | <input type="checkbox"/> Yes<br><input type="checkbox"/> No<br><input type="checkbox"/> Do not know | _  procedures                              |
| Brain aneurysm procedure                                                         | <input type="checkbox"/> Yes<br><input type="checkbox"/> No<br><input type="checkbox"/> Do not know | _  procedures                              |
| Heart surgery                                                                    | <input type="checkbox"/> Yes<br><input type="checkbox"/> No<br><input type="checkbox"/> Do not know | _  procedures                              |
| Hernia surgery (abdomen)                                                         | <input type="checkbox"/> Yes<br><input type="checkbox"/> No<br><input type="checkbox"/> Do not know | _  procedures                              |
| Peritonitis surgery                                                              | <input type="checkbox"/> Yes<br><input type="checkbox"/> No<br><input type="checkbox"/> Do not know | _  procedures                              |
| Removal of kidney stones                                                         | <input type="checkbox"/> Yes<br><input type="checkbox"/> No<br><input type="checkbox"/> Do not know | _  procedures                              |
| Removal of kidney (nephrectomy)                                                  | <input type="checkbox"/> Yes<br><input type="checkbox"/> No<br><input type="checkbox"/> Do not know | _  procedures                              |
| Reduction (partial) of kidney size                                               | <input type="checkbox"/> Yes<br><input type="checkbox"/> No<br><input type="checkbox"/> Do not know | _  procedures                              |
| Reduction (partial) of liver size                                                | <input type="checkbox"/> Yes<br><input type="checkbox"/> No<br><input type="checkbox"/> Do not know | _  procedures                              |
| Removal or puncture of non-renal cysts                                           | <input type="checkbox"/> Yes<br><input type="checkbox"/> No<br><input type="checkbox"/> Do not know | _  procedures                              |
| Removal or puncture of renal cysts                                               | <input type="checkbox"/> Yes<br><input type="checkbox"/> No<br><input type="checkbox"/> Do not know | _  procedures                              |
| Vascular access (for dialysis)                                                   | <input type="checkbox"/> Yes<br><input type="checkbox"/> No<br><input type="checkbox"/> Do not know | _  procedures                              |
| Other surgery/procedure related to ADPKD or its complications, specify:<br>_____ | <input type="checkbox"/> Yes<br><input type="checkbox"/> No<br><input type="checkbox"/> Do not know | _  procedures                              |

Cost of ADPKD patients at different stages of disease in the Nordic countries

**Site ID**

|  |  |  |
|--|--|--|
|  |  |  |
|--|--|--|

**Subject ID**

|  |  |  |
|--|--|--|
|  |  |  |
|--|--|--|

*If more room is required than the space provided, please use a separate piece of paper.*

36. Dialysis before transplantation

a. In the 6 months before transplantation, did the subject receive regular dialysis?

- Yes
- No
- Do not know

b. If yes, please indicate the initial type of dialysis and regimen during the 6 months before transplantation

| Type of dialysis                                                                                                                    | Where did the subject receive dialysis?                                                                                          | Frequency of dialysis per week (1-7 times/week) or type of PD                                                                                                                     | Duration of being on dialysis (1-26 weeks)                                                           |
|-------------------------------------------------------------------------------------------------------------------------------------|----------------------------------------------------------------------------------------------------------------------------------|-----------------------------------------------------------------------------------------------------------------------------------------------------------------------------------|------------------------------------------------------------------------------------------------------|
| <p>Haemodialysis (HD)</p> <input type="checkbox"/> Yes<br><input type="checkbox"/> No<br><input type="checkbox"/> Do not know       | <input type="checkbox"/> Home/Self-care<br><input type="checkbox"/> Home/Assisted<br><input type="checkbox"/> At clinic/hospital | <div style="border: 1px solid black; width: 40px; height: 20px; display: inline-block;"></div> per week                                                                           | <div style="border: 1px solid black; width: 60px; height: 20px; display: inline-block;"></div> weeks |
| <p>Peritoneal dialysis (PD)</p> <input type="checkbox"/> Yes<br><input type="checkbox"/> No<br><input type="checkbox"/> Do not know | <input type="checkbox"/> Home/Self-care<br><input type="checkbox"/> Home/Assisted<br><input type="checkbox"/> At clinic/hospital | <input type="checkbox"/> Continuous ambulatory peritoneal dialysis (CAPD)<br><input type="checkbox"/> Automated peritoneal dialysis (APD)<br><input type="checkbox"/> Do not know | <div style="border: 1px solid black; width: 60px; height: 20px; display: inline-block;"></div> weeks |

*If more room is required than the space provided, please use a separate piece of paper.*

37. Medical surgeries/treatment procedures in the 6 months after transplantation

a. In the 6 months after transplantation, did the subject have any medical surgeries/treatment procedures?

- Yes
- No
- Do not know

**Site ID**

|  |  |  |
|--|--|--|
|  |  |  |
|--|--|--|

**Subject ID**

|  |  |  |
|--|--|--|
|  |  |  |
|--|--|--|

b. If yes, please provide details below.

| Surgery/procedure                                                                | Did the patient have the procedure in the 6 months <u>after</u> transplantation?                    | Number of procedures in the 6-month period |
|----------------------------------------------------------------------------------|-----------------------------------------------------------------------------------------------------|--------------------------------------------|
| Acute blood transfusion                                                          | <input type="checkbox"/> Yes<br><input type="checkbox"/> No<br><input type="checkbox"/> Do not know | _  procedures                              |
| Brain aneurysm procedure                                                         | <input type="checkbox"/> Yes<br><input type="checkbox"/> No<br><input type="checkbox"/> Do not know | _  procedures                              |
| Heart surgery                                                                    | <input type="checkbox"/> Yes<br><input type="checkbox"/> No<br><input type="checkbox"/> Do not know | _  procedures                              |
| Hernia surgery (abdomen)                                                         | <input type="checkbox"/> Yes<br><input type="checkbox"/> No<br><input type="checkbox"/> Do not know | _  procedures                              |
| Peritonitis surgery                                                              | <input type="checkbox"/> Yes<br><input type="checkbox"/> No<br><input type="checkbox"/> Do not know | _  procedures                              |
| Removal of kidney stones                                                         | <input type="checkbox"/> Yes<br><input type="checkbox"/> No<br><input type="checkbox"/> Do not know | _  procedures                              |
| Removal of kidney (nephrectomy)                                                  | <input type="checkbox"/> Yes<br><input type="checkbox"/> No<br><input type="checkbox"/> Do not know | _  procedures                              |
| Reduction (partial) of kidney size                                               | <input type="checkbox"/> Yes<br><input type="checkbox"/> No<br><input type="checkbox"/> Do not know | _  procedures                              |
| Reduction (partial) of liver size                                                | <input type="checkbox"/> Yes<br><input type="checkbox"/> No<br><input type="checkbox"/> Do not know | _  procedures                              |
| Removal or puncture of non-renal cysts                                           | <input type="checkbox"/> Yes<br><input type="checkbox"/> No<br><input type="checkbox"/> Do not know | _  procedures                              |
| Removal or puncture of renal cysts                                               | <input type="checkbox"/> Yes<br><input type="checkbox"/> No<br><input type="checkbox"/> Do not know | _  procedures                              |
| Vascular access (for dialysis)                                                   | <input type="checkbox"/> Yes<br><input type="checkbox"/> No<br><input type="checkbox"/> Do not know | _  procedures                              |
| Other surgery/procedure related to ADPKD or its complications, specify:<br>_____ | <input type="checkbox"/> Yes<br><input type="checkbox"/> No<br><input type="checkbox"/> Do not know | _  procedures                              |



Cost of ADPKD patients at different stages of disease in the Nordic countries

**Site ID**

|  |  |  |
|--|--|--|
|  |  |  |
|--|--|--|

**Subject ID**

|  |  |  |
|--|--|--|
|  |  |  |
|--|--|--|

*If more room is required than the space provided, please use a separate piece of paper.*

38. Dialysis after transplantation

a. In the 6 months after transplantation, did the subject receive regular dialysis?

- Yes
- No
- Do not know

b. If yes, please indicate the initial type of dialysis and regimen during the 6 months after transplantation

| Type of dialysis                                                                                                                | Where did the subject receive dialysis?                                                                                          | Frequency of dialysis per week (1-7 times/week) or type of PD                                                                                                                     | Duration of being on dialysis (1-26 weeks)                                                           |
|---------------------------------------------------------------------------------------------------------------------------------|----------------------------------------------------------------------------------------------------------------------------------|-----------------------------------------------------------------------------------------------------------------------------------------------------------------------------------|------------------------------------------------------------------------------------------------------|
| Haemodialysis (HD)<br><input type="checkbox"/> Yes<br><input type="checkbox"/> No<br><input type="checkbox"/> Do not know       | <input type="checkbox"/> Home/Self-care<br><input type="checkbox"/> Home/Assisted<br><input type="checkbox"/> At clinic/hospital | <div style="border: 1px solid black; width: 40px; height: 20px; display: inline-block;"></div> per week                                                                           | <div style="border: 1px solid black; width: 40px; height: 20px; display: inline-block;"></div> weeks |
| Peritoneal dialysis (PD)<br><input type="checkbox"/> Yes<br><input type="checkbox"/> No<br><input type="checkbox"/> Do not know | <input type="checkbox"/> Home/Self-care<br><input type="checkbox"/> Home/Assisted<br><input type="checkbox"/> At clinic/hospital | <input type="checkbox"/> Continuous ambulatory peritoneal dialysis (CAPD)<br><input type="checkbox"/> Automated peritoneal dialysis (APD)<br><input type="checkbox"/> Do not know | <div style="border: 1px solid black; width: 40px; height: 20px; display: inline-block;"></div> weeks |

*If more room is required than the space provided, please use a separate piece of paper.*

39. Immunosuppressive medication

a. In the 6 months after transplant, did the subject receive immunosuppressive medication?

- Yes
- No
- Do not know

**Site ID**

|  |  |  |
|--|--|--|
|  |  |  |
|--|--|--|

**Subject ID**

|  |  |  |
|--|--|--|
|  |  |  |
|--|--|--|

b. If yes, please provide the details of the immunosuppressive medication provided in the 6 months after transplant.

|                                                                                                                                                                           |                                                                                                                                                                                                                                                                                                                                                                                                  |
|---------------------------------------------------------------------------------------------------------------------------------------------------------------------------|--------------------------------------------------------------------------------------------------------------------------------------------------------------------------------------------------------------------------------------------------------------------------------------------------------------------------------------------------------------------------------------------------|
| <p>Has the subject received the following types of medication during the 6-month period?</p>                                                                              | <p>If yes, please indicate/write the name of medication(s), and the duration of treatment during the 6-month period (1-26 weeks)</p>                                                                                                                                                                                                                                                             |
| <p>T-cell suppressive agents (CNIs or mTor-1 inhibitors)</p> <p><input type="checkbox"/> Yes<br/><input type="checkbox"/> No<br/><input type="checkbox"/> Do not know</p> | <p><input type="checkbox"/> Ciclosporin (CsA) <span style="float: right;">    weeks</span></p> <p><input type="checkbox"/> Sirolimus (SiR) <span style="float: right;">    weeks</span></p> <p><input type="checkbox"/> Tacrolimus (TAC) <span style="float: right;">    weeks</span></p> <p><input type="checkbox"/> Other: _____ <span style="float: right;">    weeks</span></p>              |
| <p>Cytotoxic agents (Anti-metabolites)</p> <p><input type="checkbox"/> Yes<br/><input type="checkbox"/> No<br/><input type="checkbox"/> Do not know</p>                   | <p><input type="checkbox"/> Azathioprine (AZA) <span style="float: right;">    weeks</span></p> <p><input type="checkbox"/> Cyclophosphamide <span style="float: right;">    weeks</span></p> <p><input type="checkbox"/> Mycophenolate mofetil (MMF) <span style="float: right;">    weeks</span></p> <p><input type="checkbox"/> Other: _____ <span style="float: right;">    weeks</span></p> |
| <p>Corticosteroids (cortisone)</p> <p><input type="checkbox"/> Yes<br/><input type="checkbox"/> No<br/><input type="checkbox"/> Do not know</p>                           | <p><input type="checkbox"/> Prednisolone <span style="float: right;">    weeks</span></p> <p><input type="checkbox"/> Other: _____ <span style="float: right;">    weeks</span></p>                                                                                                                                                                                                              |

**Site ID**

|  |  |  |
|--|--|--|
|  |  |  |
|--|--|--|

**Subject ID**

|  |  |  |
|--|--|--|
|  |  |  |
|--|--|--|

|                                                                                                                                                                            |                                                                                                                                                                                                                                                                                                                                                                                                                                                                                |
|----------------------------------------------------------------------------------------------------------------------------------------------------------------------------|--------------------------------------------------------------------------------------------------------------------------------------------------------------------------------------------------------------------------------------------------------------------------------------------------------------------------------------------------------------------------------------------------------------------------------------------------------------------------------|
| <p>Has the subject received the following types of medication during the 6-month period?</p>                                                                               | <p>If yes, please indicate/write the name of medication(s), and the duration of treatment during the 6-month period (1-26 weeks)</p>                                                                                                                                                                                                                                                                                                                                           |
| <p>Other immunosuppressive medication, not listed above</p> <p><input type="checkbox"/> Yes<br/> <input type="checkbox"/> No<br/> <input type="checkbox"/> Do not know</p> | <p><input type="checkbox"/> Anti-t-lymphocyte globulin, ATG <span style="float: right;">    weeks</span></p> <p><input type="checkbox"/> Basiliximab <span style="float: right;">    weeks</span></p> <p><input type="checkbox"/> Belatacept <span style="float: right;">    weeks</span></p> <p><input type="checkbox"/> Rituximab <span style="float: right;">    weeks</span></p> <p><input type="checkbox"/> Other: _____ <span style="float: right;">    weeks</span></p> |

*If more room is required than the space provided, please use a separate piece of paper*

Cost of ADPKD patients at different stages of disease  
in the Nordic countries

| Site ID |  |  |
|---------|--|--|
|         |  |  |

| Subject ID |  |  |
|------------|--|--|
|            |  |  |

---

**Signature: Investigator or Nominated Research Staff**

---

40. I have reviewed all pages of this CRF and certify that they are accurate and complete:

Name:

\_\_\_\_\_

Signature:

\_\_\_\_\_

Date:

|   |   |   |   |   |   |   |   |   |   |
|---|---|---|---|---|---|---|---|---|---|
|   |   | / |   |   | / |   |   |   |   |
| D | D |   | M | M |   | Y | Y | Y | Y |
